1 **Peroxiredoxin 5 regulates osteogenic differentiation via interaction with hnRNPK**  
2 **during bone regeneration**

3

4 Eunjin Cho<sup>1</sup>, Xiangguo Che<sup>2</sup>, Mary Jasmin Ang<sup>3</sup>, Seongmin Cheon<sup>4</sup>, Jinkyung Lee<sup>1</sup>, Kwang  
5 Soo Kim<sup>5</sup>, Chang Hoon Lee<sup>6</sup>, Sang-Yeop Lee<sup>7</sup>, Hee-Young Yang<sup>8</sup>, Changjong Moon<sup>3</sup>,  
6 Chungoo Park<sup>4</sup>, Je-Yong Choi<sup>2</sup>, and Tae-Hoon Lee<sup>1</sup> \*

7 <sup>1</sup>Department of Biochemistry & Department of Molecular Medicine, Korea Mouse Phenotype  
8 Center (KMPC), Dental Science Research Institute, School of Dentistry, Chonnam National  
9 University, Gwangju, 61186, Republic of Korea

10 <sup>2</sup>Department of Biochemistry and Cell Biology, BK21 Plus KNU Biomedical Convergence  
11 Program, Skeletal Diseases Analysis Center, Korea Mouse Phenotyping Center (KMPC),  
12 School of Medicine, Kyungpook National University, Daegu 41944, Republic of Korea

13 <sup>3</sup>Department of Veterinary Anatomy and Animal Behavior, College of Veterinary Medicine  
14 and BK21 FOUR Program, Chonnam National University, Gwangju 61186, Republic of  
15 Korea

16 <sup>4</sup>School of Biological Sciences and Technology, Chonnam National University, Gwangju  
17 61186, Republic of Korea

18 <sup>5</sup>Department of Microbiology, Department of Molecular Medicine (BK21plus), Chonnam  
19 National University Medical School, Gwangju, 61468, Republic of Korea

20 <sup>6</sup>Therapeutic & Biotechnology Division, Drug Discovery Platform Research Center, Research  
21 Institute of Chemical Technology (KRICT), Daejeon 34114, Republic of Korea

22 <sup>7</sup>Research Center for Bioconvergence Analysis, Korea Basic Science Institute, Ochang,  
23 28119, Republic of Korea

24 <sup>8</sup>Preclinical Research Center, Daegu-Gyeongbuk Medical Innovation Foundation (DGMIF),  
25 Daegu 41061, Republic of Korea

26

27 \* Correspondence and requests for materials should be addressed to T-H.L. (email:  
28 thlee83@jnu.ac.kr)

## 29 **Abstract**

30 Peroxiredoxin 5 (Prdx5) is involved in pathophysiological regulation via the stress-induced  
31 cellular response. However, the function of Prdx5 in the bone remains largely unknown.  
32 Here, we show that Prdx5 is involved in osteoclast and osteoblast differentiation, resulting in  
33 osteoporotic phenotypes in *Prdx5* knockout (*Prdx5*<sup>Ko</sup>) mice. Through immunoprecipitation  
34 and liquid chromatography combined with tandem mass spectrometry analysis,  
35 heterogeneous nuclear ribonucleoprotein K (hnRNPK) was identified as a potential binding  
36 partner of Prdx5 during osteoblast differentiation *in vitro*. We found that Prdx5 acts as a  
37 negative regulator of hnRNPK-mediated osteocalcin (*Ocn*) expression. In addition,  
38 transcriptomic analysis revealed that *in vitro* differentiated osteoclasts from the bone  
39 marrow-derived macrophages of *Prdx5*<sup>Ko</sup> mice showed enhanced expression of several  
40 osteoclast-related genes. These findings indicate that Prdx5 might contribute to the  
41 maintenance of bone homeostasis by regulating osteoblast differentiation. This study  
42 proposes a new function of Prdx5 in bone remodeling that may be used in developing  
43 therapeutic strategies for bone diseases.

44

## 45 **Introduction**

46 The bone is remodeled through continuous replacement of old tissues by new tissues (Sims  
47 & Walsh, 2012). This process involves bone deposition or production by osteoblasts and

48 bone resorption by osteoclasts, which are responsible for the breakdown of old bone tissues  
49 (Knothe Tate et al., 2004; Yang et al., 2020). Remodeling allows bones to adapt to stress;  
50 for instance, bones can become thick and strong when subjected to stress, and bones that  
51 are not exposed to regular stress begin to lose mass (Wang et al., 2022). However, the  
52 balance between osteoclasts and osteoblasts is critical in bone remodeling; an imbalance  
53 between these cells can lead to bone loss (Weitzmann & Oforokun, 2016).

54 Peroxiredoxins (Prdxs) are a large superfamily of antioxidant enzymes that reduce  
55 peroxides (Rhee, 2016). Prdxs are classified as 1-Cys (Prdx1–5) and 2-Cys (Prdx6) based  
56 on their conserved cysteine residues (Seong et al., 2021), and they protect cells from  
57 oxidative stress (Lee et al., 2020; Rhee, 2016). Prdx6 inhibits bone formation in newborn  
58 mice (Park et al., 2019). Thioredoxin-1 induces osteoclast differentiation, which is  
59 suppressed by glutathione peroxidase-1 and Prdx1 (Lean et al., 2004). Prdx5 acts as a  
60 mitochondrial antioxidant and regulates ciliogenesis, adipogenesis, and fibrogenesis (Choi et  
61 al., 2019; Ji et al., 2019; Kim et al., 2018). Furthermore, it ameliorates obesity-induced non-  
62 alcoholic fatty liver disease by modulating mitochondrial reactive oxygen species (ROS) (Kim  
63 et al., 2020). From a biochemical perspective, Prdx5 regulates the activation of cyclin-  
64 dependent kinase 5 and  $Ca^{2+}$ /calcineurin-Drp1, Jak2–Stat5 modulation during pathogenic  
65 conditions via antioxidant activity, and the protein–protein interactions (Choi et al., 2013;  
66 Chung et al., 2010; Park et al., 2016; Park et al., 2017; Yang et al., 2010). However, the role  
67 of Prdx5 in bone remodeling has not yet been studied.

68 Heterogeneous nuclear ribonucleoproteins (hnRNPs) are a family of nuclear proteins that  
69 function in mRNA biogenesis, including pre-mRNA splicing (Expert-Bezancon et al., 2002),  
70 transport of mRNA from the nucleus to the cytosol (Michael et al., 1997), and translation  
71 (Ostareck et al., 1997). Heterogeneous nuclear ribonucleoprotein K (hnRNPK) is a unique  
72 member of this family, as it preferentially binds single-stranded DNA, whereas other RNPs  
73 bind RNA (Siomi et al., 1994). hnRNPK is a multifunctional molecule, which can act both in

74 the cytosol and nucleus (Krecic & Swanson, 1999; Mikula et al., 2010), and has been  
75 implicated in different cellular processes, including gene transcription (Michelotti et al., 1996;  
76 Tomonaga & Levens, 1996) and chromatin remodeling (Denisenko & Bomsztyk, 2002), in  
77 addition to the more typical functions of splicing and mRNA transport to the cytoplasm  
78 (Dreyfuss et al., 1993). hnRNPk mutation in humans causes a Kabuki-like syndrome with  
79 skeletal abnormalities and facial dysmorphism (Wang et al., 2020); acute myeloid leukemia  
80 patients show aberrant hnRNPk expression (Gallardo et al., 2015). hnRNPk deletion in mice  
81 is embryonically lethal, and haploinsufficiency results in developmental defects with skeletal  
82 disorders and post-natal death (Au et al., 2018; Dentici et al., 2018; Gallardo et al., 2015).  
83 hnRNPk acts as a transcription factor and regulates translation by binding to promoters. In  
84 cancer, hnRNPk binds to the promoter regions of *c-myc* and *c-src* to elevate their  
85 transcription or binds to their mRNAs to control translation (Naarmann et al., 2008; Perrotti &  
86 Neviani, 2007; Ritchie et al., 2003). In the bone, hnRNPk interacts with glycogen synthase  
87 kinase 3 beta to promote osteoclast differentiation (Fan et al., 2015). During osteoblast  
88 differentiation, hnRNPk binds to the promoter region of osteocalcin (*Ocn*) and represses its  
89 transcription (Stains et al., 2005). However, hnRNPk requires other interacting proteins to  
90 regulate gene expression, and the underlying mechanisms in the bone are largely  
91 unexplored.

92 Here, we examined Prdxs during osteoblast and osteoclast differentiation *in vitro*.  
93 Interestingly, Prdx5 expression was significantly altered during cell differentiation, i.e., it was  
94 upregulated during osteogenesis but suppressed during osteoclastogenesis. Therefore, we  
95 defined the role of Prdx5 in the bone using *Prdx5*-deficient (Ko) mice. In micro-computed  
96 tomography (micro-CT) analysis, *Prdx5*<sup>Ko</sup> mice showed osteoporosis-like phenotypes with  
97 increased osteoclast and reduced osteoblast differentiation. *Prdx5*<sup>Ko</sup> mice showed a delay in  
98 osteogenesis in the calvarial defect model. To determine the interacting partners of Prdx5  
99 during osteogenesis, we performed liquid chromatography combined with tandem mass

100 spectrometry (LC-MS/MS) analysis. Among the binding partners, hnRNPK colocalized with  
101 Prdx5 during osteoblast differentiation. We suggested that Prdx5 controls hnRNPK  
102 translocation to inhibit its binding to the *Ocn* promoter for osteoblast differentiation. RNA-  
103 sequencing (RNA-seq) analysis showed a significant increase in the expression of  
104 osteoclast-related genes in the osteoclasts differentiated from bone marrow-derived  
105 macrophages (BMMs) of *Prdx5*<sup>K<sup>o</sup></sup> mice compared to that in the osteoclasts of wild-type (WT)  
106 mice. These results indicate a new role of Prdx5 in bone biology, i.e., Prdx5 homeostasis is  
107 critical in bone remodeling. Therefore, Prdx5 may be useful for understanding and  
108 preventing osteoporotic diseases involving osteoclast activity.

109

## 110 **Results**

### 111 **Prdx5 is controlled during bone cell differentiation**

112 To elucidate whether Prdxs function in bone remodeling, we characterized the expression of  
113 all Prdxs (Prdx1–6) during osteoclast and osteoblast differentiation *in vitro* (Figure 1). First,  
114 calvaria-derived pre-osteoblasts were differentiated into osteoblasts via stimulation with  
115 bone morphogenic protein 2 (BMP2). The mRNA levels of *Prdx3* and *Prdx5* were  
116 significantly elevated upon BMP2 stimulation (Figure 1A). During osteoblast differentiation,  
117 *Prdx2* and *Prdx5* expression was increased by BMP2 stimulation (Figure 1B). To explore the  
118 function of Prdxs in osteoclast differentiation, BMMs were differentiated into osteoclasts via  
119 treatment with receptor activator of the nuclear factor- $\kappa$ B ligand (RANKL). The mRNA levels  
120 of *Prdx1* and *Prdx5* were significantly reduced (Figure 1C). *Prdx4* and *Prdx5* expression was  
121 altered by RANKL treatment (Figure 1D). Interestingly, *Prdx5* levels were reduced during  
122 osteoclastogenesis but increased during osteogenesis, with a correlation between mRNA  
123 and protein expression. Therefore, we focused on *Prdx5* as a potential regulator of bone  
124 remodeling.

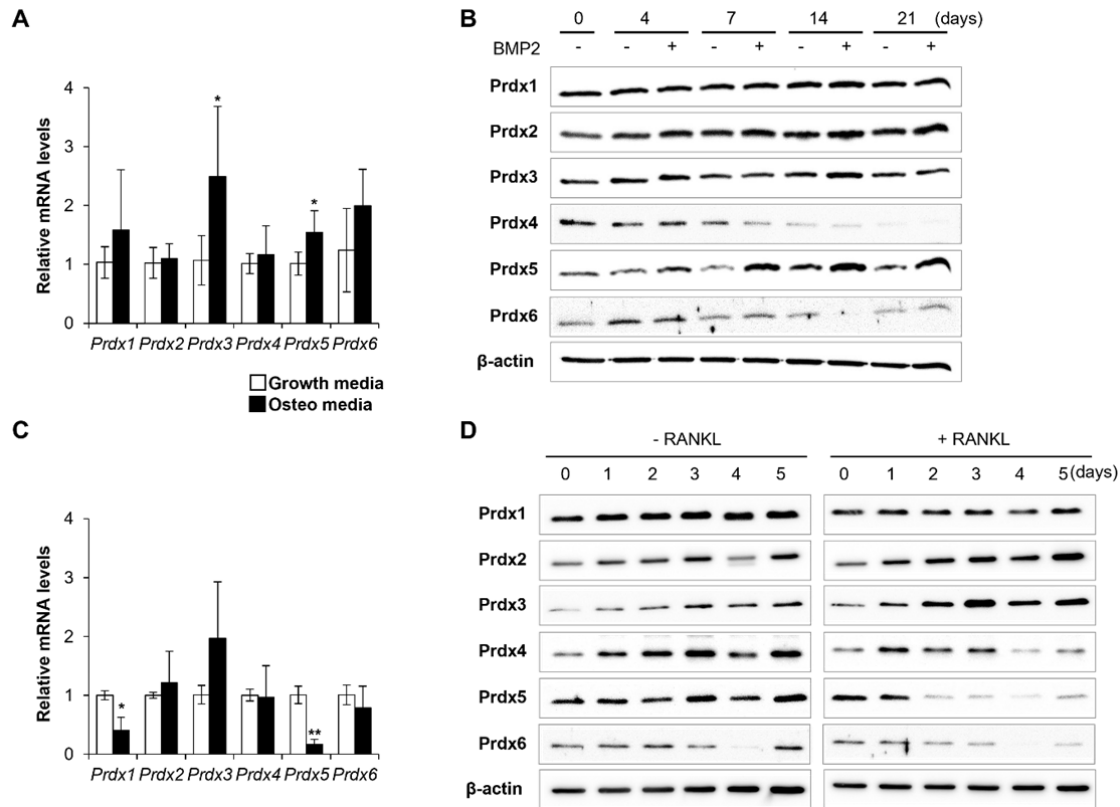

125

126 **Figure 1.** Prdx 5 expression is controlled during bone cell differentiation. (A) mRNA  
 127 expression of Prdxs was determined, using qRT-PCR, in osteoblasts on day 7 after BMP2  
 128 stimulation. (B) Protein levels of Prdxs in osteoblasts were determined via western blotting.  
 129 (C) mRNA levels of Prdxs were determined in osteoclasts on day 3 after RANKL stimulation.  
 130 (D) Protein levels of Prdxs in osteoclasts were determined using western blotting. Graph  
 131 depicts mean  $\pm$  SD. \* $p < 0.05$ , \*\* $p < 0.01$  via an unpaired two-tailed Student's *t*-test.

132

133 **Abnormal expression of Prdx5 modulates osteoblastogenesis and osteoclastogenesis**  
 134 ***in vitro***

135 To clarify the roles of Prdx5 in osteoblast and osteoclast differentiation, we thoroughly  
 136 examined its expression *in vitro*. Prdx5 mRNA expression was elevated by BMP2 stimulation  
 137 on days 4 and 7 and decreased on day 14 (Figure 2A). However, Prdx expression was

138 continuously upregulated till day 14. We isolated the precursor cells from *Prdx5<sup>Ko</sup>* mice and  
139 examined osteoblast differentiation using alkaline phosphatase (ALP) staining. Osteoblast  
140 differentiation was strongly inhibited in *Prdx5<sup>Ko</sup>* cells on day 7 (Figure 2B). To examine the  
141 expression of osteoblast-specific genes, we performed quantitative reverse transcription-  
142 PCR (qRT-PCR) on day 7 after BMP2 administration (Figure 2C). The mRNA levels of Runt-  
143 related transcription factor 2 (*Runx2*), *Alp*, and *Ocn* were increased. However, the  
144 upregulation in *Prdx5<sup>Ko</sup>* cells was not significant compared to that in WT. These results  
145 suggest that Prdx5 is necessary for osteoblast differentiation, as it regulates osteogenic  
146 marker gene expression.

147 Next, we analyzed Prdx5 expression during osteoclast differentiation after RANKL and  
148 macrophage colony-stimulating factor (M-CSF) administration (Figure 2D–F). Prdx5  
149 expression decreased from the first day of osteoclastogenesis (Figure 2D). The efficacy of  
150 osteoclast differentiation was examined in the BMMs from *Prdx5<sup>Ko</sup>* mice (Figure 2E). To  
151 determine the number of differentiated osteoclasts, tartrate-resistant acid phosphatase  
152 (TRAP, *Acp5*) staining was performed. Interestingly, the *Prdx5<sup>Ko</sup>* BMMs showed a 2-fold  
153 increase in TRAP-positive areas compared to the WT. Osteoclasts become multinucleated  
154 giant cells via cell–cell fusion to acquire bone resorption activity (Kodama & Kaito, 2020).  
155 Therefore, we measured the number of nuclei in a TRAP-positive cell as an indicator of cell  
156 fusion. *Prdx5<sup>Ko</sup>* cells showed a smaller number of nuclei than WT. During osteoclastogenesis,  
157 the levels of *Acp5* and cathepsin K (*CtsK*) increase remarkably in mature osteoclasts, and  
158 the transcription factor c-Fos regulates nuclear factor of activated T cells cytoplasmic 1  
159 (NFATc1)-mediated signaling pathways (Nagy & Penninger, 2015; Yang & Karsenty, 2002).  
160 The mRNA levels of *Acp5* and *CtsK* were significantly reduced in *Prdx5<sup>Ko</sup>* cells on day 3  
161 (Figure 2F) but increased up to the levels in WT on days 4 and 5 (Figure 2–figure  
162 supplement 1). These data suggest that, in *Prdx5<sup>Ko</sup>*, BMMs develop osteoclasts at a slower  
163 rate than that in WT. These differences are not altered at the maturation stage of osteoclasts

164 *in vitro*.

165 To determine whether the osteoporosis phenotype in *Prdx5*<sup>Ko</sup> mice is because of an  
166 increase in ROS levels, we determined ROS levels in cultured osteoblasts and osteoclasts  
167 from *Prdx5*<sup>Ko</sup> and WT mice (Figure 2–figure supplement 2). In osteoblasts, the precursor  
168 cells from *Prdx5*<sup>Ko</sup> mice showed slightly reduced ROS levels than those from WT. In  
169 osteoblasts, ROS levels increased in WT cells after BMP2 stimulation, whereas ROS in  
170 *Prdx5*<sup>Ko</sup> cells were maintained at the precursor levels. However, ROS levels were not  
171 changed upon RANKL-stimulation during osteoclast differentiation in WT and *Prdx5*<sup>Ko</sup> cells.  
172 These data suggest that ROS are not significantly involved in Prdx5-mediated osteoblast or  
173 osteoclast differentiation. Therefore, Prdx5 may regulate alternative mechanisms of bone  
174 cell differentiation, apart from acting as an antioxidant.



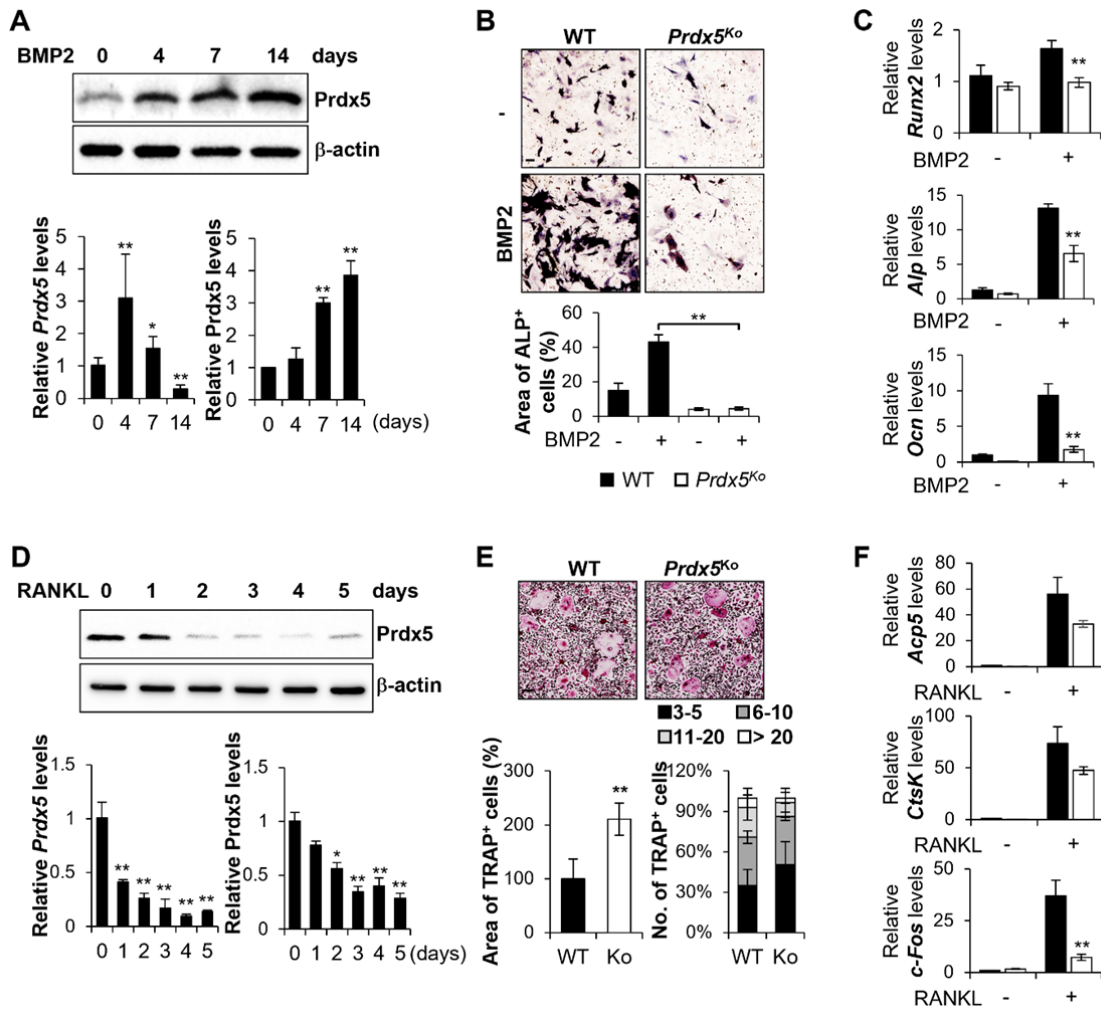

175

176 **Figure 2.** Abnormal expression of Prdx5 modulates osteoblastogenesis and  
 177 osteoclastogenesis *in vitro*. (A, B, C) Mouse calvaria-derived pre-osteoblasts were  
 178 differentiated into osteoblasts through BMP2 stimulation for indicated time periods. (A)  
 179 Western blotting and qRT-PCR were performed to determine Prdx5 expression during  
 180 osteoblastogenesis. (B) Pre-osteoblasts were isolated from WT and *Prdx5<sup>Ko</sup>* mice and then  
 181 differentiated into osteoblasts for 7 days. ALP staining was performed to determine the  
 182 number of osteoblasts, and the area of ALP-positive cells was measured using the Image J  
 183 software. (C) qRT-PCR was performed to determine osteogenic gene expression on day 7.  
 184 (D, E, F) BMMs were differentiated into osteoclasts through 30 ng/mL M-CSF and 50 ng/mL

185 RANKL stimulation for indicated time periods. (D) Western blotting and qRT-PCR were  
186 performed to determine Prdx5 expression during osteoclastogenesis. (E) BMMs were  
187 isolated from WT and *Prdx5*<sup>Ko</sup> mice and then differentiated into osteoclasts for 4 days. TRAP  
188 staining was performed to determine the number of osteoclasts, and the area of TRAP-  
189 positive cells was measured. The number of multinucleated cells harboring the indicated  
190 nuclei was counted. (F) qRT-PCR was performed to determine the expression of osteoclast-  
191 related genes. Graph depicts mean  $\pm$  sem. \* $p < 0.05$ , \*\* $p < 0.01$  via an unpaired two-tailed  
192 Student's *t*-test compared to control (0) or WT.

193

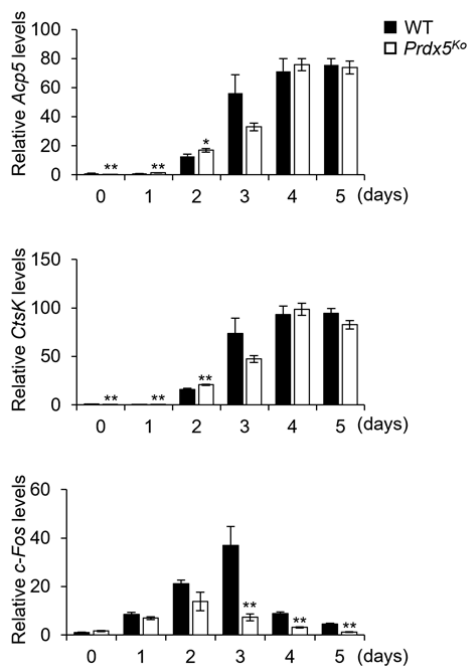

194

195 **Figure 2-figure supplement 1.** qRT-PCR was performed to determine the expression of  
196 osteoclast-related genes during osteoclastogenesis.

197

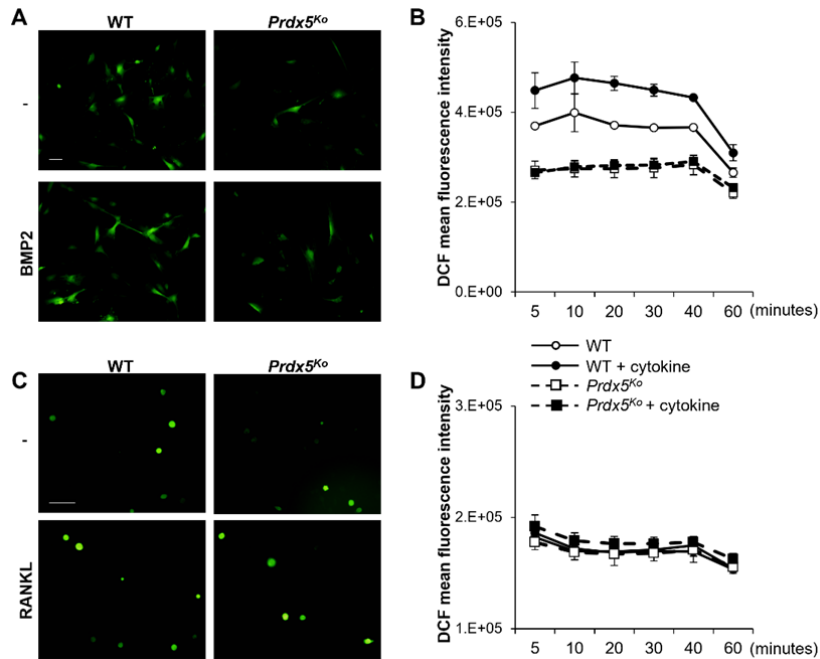

198

199 **Figure 2–figure supplement 2.** ROS levels are not altered in *Prdx5*-deficient osteoblasts.

200 (A) Cellular ROS levels were measured via DCF fluorescence. The images were captured

201 after 20 min of BMP2 stimulation of osteoblasts. Scale bar, 100 μm. (B) ROS levels were

202 measured at indicated time periods after BMP2 stimulation. (C) Cellular ROS levels were

203 measured after RANKL stimulation in osteoclasts. Scale bar, 100 μm. (D) ROS levels were

204 measured at indicated times after RANKL stimulation.

205

### 206 ***Prdx5*<sup>KO</sup> mice show enhanced osteoporotic phenotypes**

207 To determine the role of *Prdx5* in bone remodeling *in vivo*, we analyzed bone parameters in

208 *Prdx5*<sup>KO</sup> mice (Figure 3). Micro-CT analysis of the distal femurs showed that *Prdx5*<sup>KO</sup> mice

209 had low bone mineral density (BMD) and trabecular number (Tb. N) and an increased

210 trabecular bone space (Tb. Sp) compared to those in their WT littermates (Figure 3B).

211 Additionally, *Prdx5*<sup>KO</sup> mice showed reduced trabecular volume (Tb. V) and thickness (Tb. Th),

212 which suggested reduced trabecular bone formation in *Prdx5*<sup>KO</sup> mice compared to that in WT.

213 To determine bone-related cytokine levels in the serum, RANKL, osteoprotegerin (OPG),  
214 and BMP2 levels were examined (Figure 3C). In *Prdx5<sup>Ko</sup>* mice, RANKL and OPG levels  
215 increased by 1.5-fold compared to those in WT. However, BMP2 levels were not altered in  
216 *Prdx5<sup>Ko</sup>* mice. These findings suggested that osteoporosis-like phenotypes in *Prdx5<sup>Ko</sup>* mice  
217 were mediated by an increase in RANKL expression.

218 We confirmed the osteogenic potential in mouse femurs stained with TRAP and ALP,  
219 which are the markers of osteoclasts and osteoblasts, respectively (Figure 3D). The number  
220 of total TRAP-positive cells was not altered in *Prdx5<sup>Ko</sup>* mice. Since *Prdx5<sup>Ko</sup>* mice showed less  
221 trabecular bone volume (Figure 3B), we measured the ratio of osteoclast and bone surfaces.  
222 *Prdx5<sup>Ko</sup>* mice showed higher osteoclast surface ratios than WT (Figure 3E). The total  
223 number of ALP-positive cells reduced in *Prdx5<sup>Ko</sup>* mice; however, the reduction was not  
224 statistically significant. Altogether, *Prdx5<sup>Ko</sup>* mice showed increased number of osteoclasts in  
225 the femurs. These osteoporotic phenotypes were not observed in female mice (Figure 3–  
226 figure supplement 1). *Prdx5<sup>Ko</sup>* females showed no differences in BMD, bone volume, and  
227 trabecular bone thickness and space. Therefore, we examined bone parameters in an  
228 ovariectomy-induced osteoporosis mouse model (OVX) (Figure 3–figure supplement 1).  
229 Micro-CT analysis revealed that OVX mice displayed significantly lower Tb. V and Tb. N than  
230 sham mice; however, no significant differences were observed between WT and *Prdx5<sup>Ko</sup>*  
231 mice. These findings indicate that Prdx5 may not act as a hormone-dependent regulator,  
232 and osteoporosis phenotypes observed in males are specific responses of Prdx5.  
233 Nonetheless, hormones compensate for Prdx5-mediated osteoporosis.

234

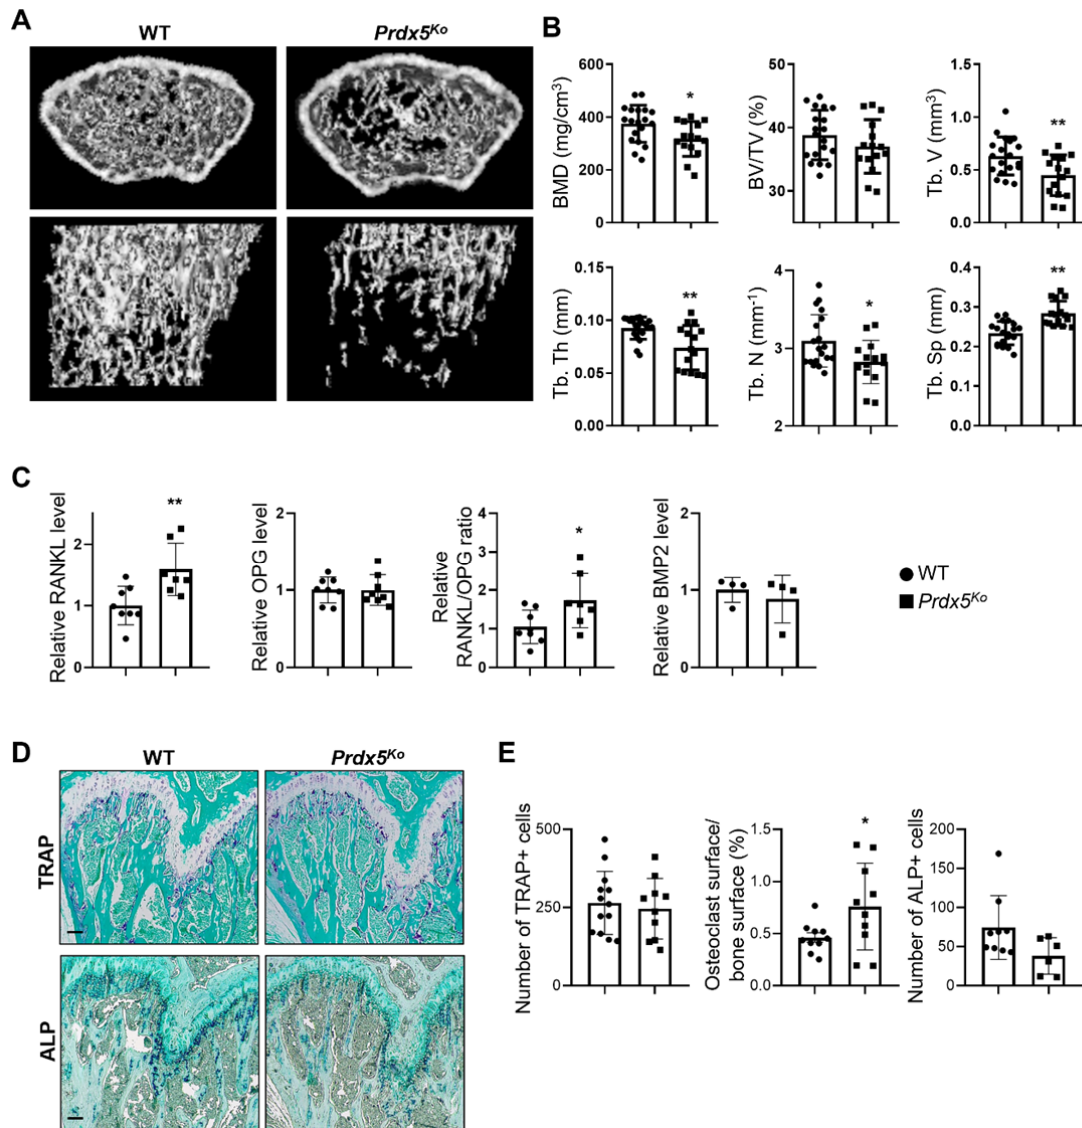

235

236 **Figure 3.** *Prdx5<sup>KO</sup>* mice show enhanced osteoporotic phenotypes. (A) Micro-CT images of  
 237 femurs from 12-week-old WT and *Prdx5<sup>KO</sup>* male mice. (B) Micro-CT data were quantified (n =  
 238 15–19). BMD, bone mineral density; BV/TV, bone volume relative to total tissue volume; Tb.  
 239 V, trabecular volume; Tb. Th, trabecular bone thickness; Tb. N, trabecular bone number; Tb.  
 240 Sp, trabecular bone space. (C) Quantitative analysis of the levels of RANKL, OPG, and  
 241 BMP2 in the sera from WT and *Prdx5<sup>KO</sup>* mice at 12 weeks. (n = 4–8). (D) Representative  
 242 TRAP and ALP staining images of the mouse femora. TRAP- or ALP-positive cells were  
 243 stained as purple, and the bone was counterstained with Fast Green as blue. Scale bar, 100

244  $\mu\text{m}$ . (E) Quantification of the TRAP- or ALP-positive cells shown in (D). (n = 6–10)

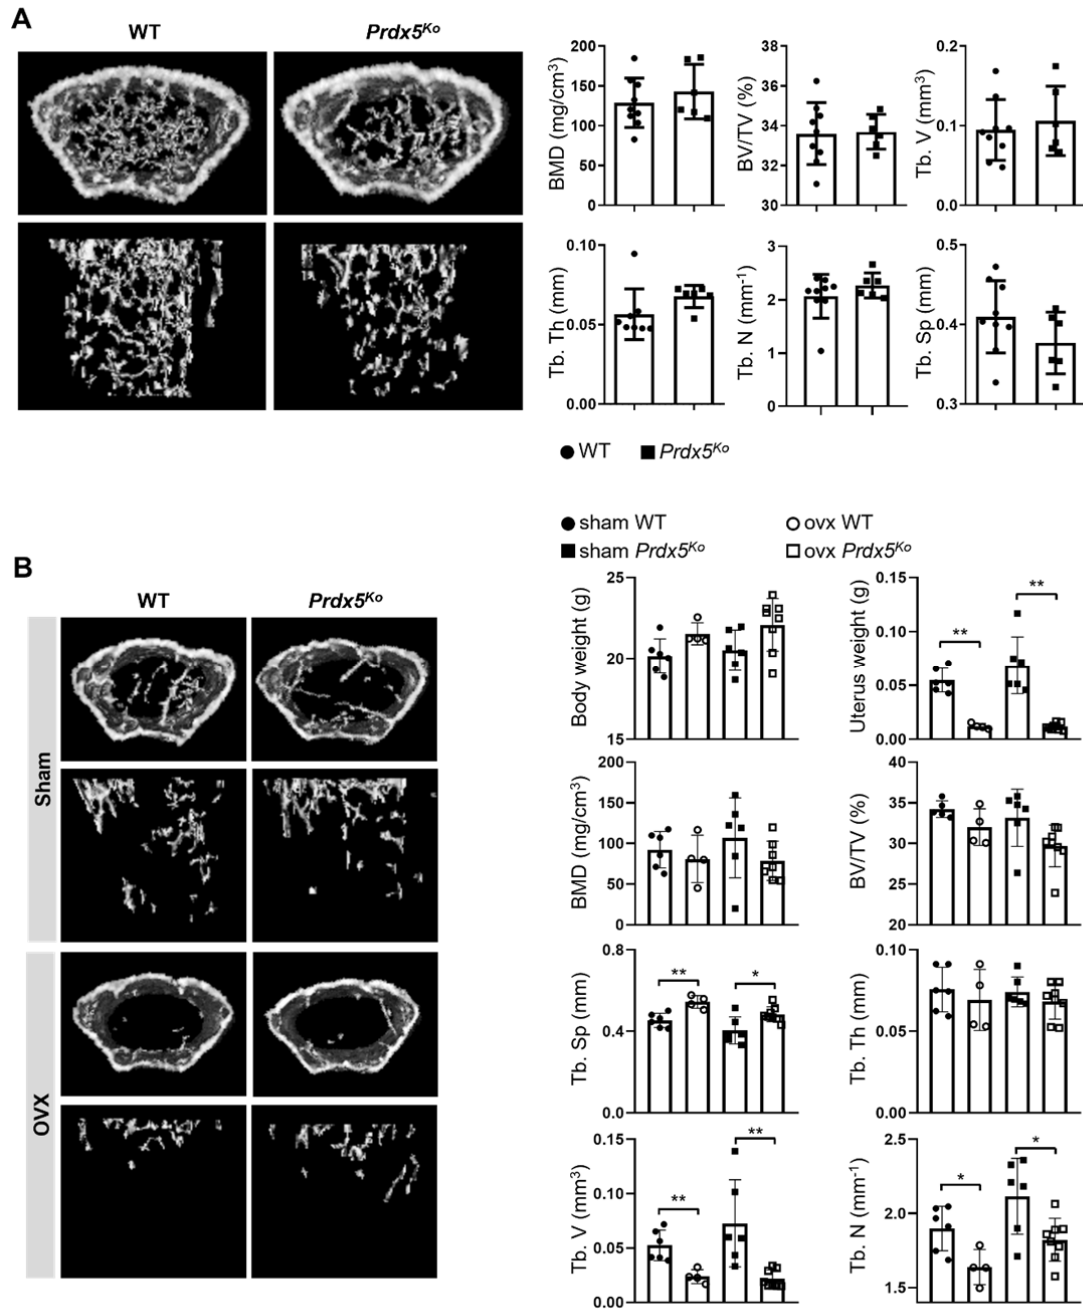

245

246 **Figure 3—figure supplement 1.** Female mice show normal phenotypes. (A) Micro-CT  
 247 images of femurs from WT and *Prdx5<sup>Ko</sup>* mice at 12 weeks. Micro-CT data were quantified (n  
 248 = 6–9). BMD, bone mineral density; BV/TV, bone volume relative to total tissue volume; Tb.

249 V, trabecular volume; Tb. Th, trabecular bone thickness; Tb. N, trabecular bone number; Tb.  
250 Sp, trabecular bone space. (B) OVX or sham surgery was performed on 10-week-old  
251 females that were sacrificed after 4 weeks for micro-CT analysis (n = 4–8)

252

### 253 **Limited bone remodeling activities in *Prdx5*<sup>Ko</sup> mice**

254 To determine the bone remodeling activity, we examined the bone turnover rates in *Prdx5*<sup>Ko</sup>  
255 mice. First, we confirmed osteoblast function using trichrome staining and dynamic bone  
256 histomorphometry analysis *in vivo* (Figure 4—figure supplement 1). Trichrome staining  
257 revealed lower osteoid volume per bone volume in *Prdx5*<sup>Ko</sup> mice than in WT, indicating  
258 reduced bone modeling in *Prdx5*-deficient mice. In *Prdx5*<sup>Ko</sup> mice, a lower width between  
259 calcein and alizarin red S labeling and lower mineral apposition rate (MAR) in the trabecular  
260 bone were observed than those in WT mice. However, cortical bone revealed no alteration.  
261 Thus, *Prdx5*<sup>Ko</sup> mice exhibited reduced bone turnover parameters, which indicated the  
262 suppression of newly formed bone tissue in the trabecular bone.

263 Next, to test osteogenic potential *in vivo*, we analyzed the osteogenic healing capacity  
264 using the calvarial defect model in *Prdx5*<sup>Ko</sup> mice and their WT littermates (Figure 4). After the  
265 calvarial bone was trepanned, mice were treated with BMP2 or phosphate-buffered saline  
266 (PBS) for 3 weeks. In BMP2-administered mice, newly formed bones were observed;  
267 however, *Prdx5*<sup>Ko</sup> mice showed a lesser extent of new bone formation than WT (Figure 4A).  
268 Immunostaining analysis was performed to measure cross-sectional area and bone volume.  
269 Larger puncture and smaller bone volume were observed in the calvaria of *Prdx5*<sup>Ko</sup> mice  
270 than in those of WT (Figure 4B). The BMP2-restored lesions in *Prdx5*<sup>Ko</sup> mice were thinner  
271 than those in WT mice, and the number of TRAP-positive cells and the osteoclast  
272 surface/bone surface ratio were similar in *Prdx5*<sup>Ko</sup> and WT mice. However, *Prdx5*<sup>Ko</sup> mice had  
273 fewer ALP-positive osteoblasts than WT (Figure 4C, D). These results imply that *Prdx5* plays

274 an essential role in osteoblast-mediated bone regeneration.

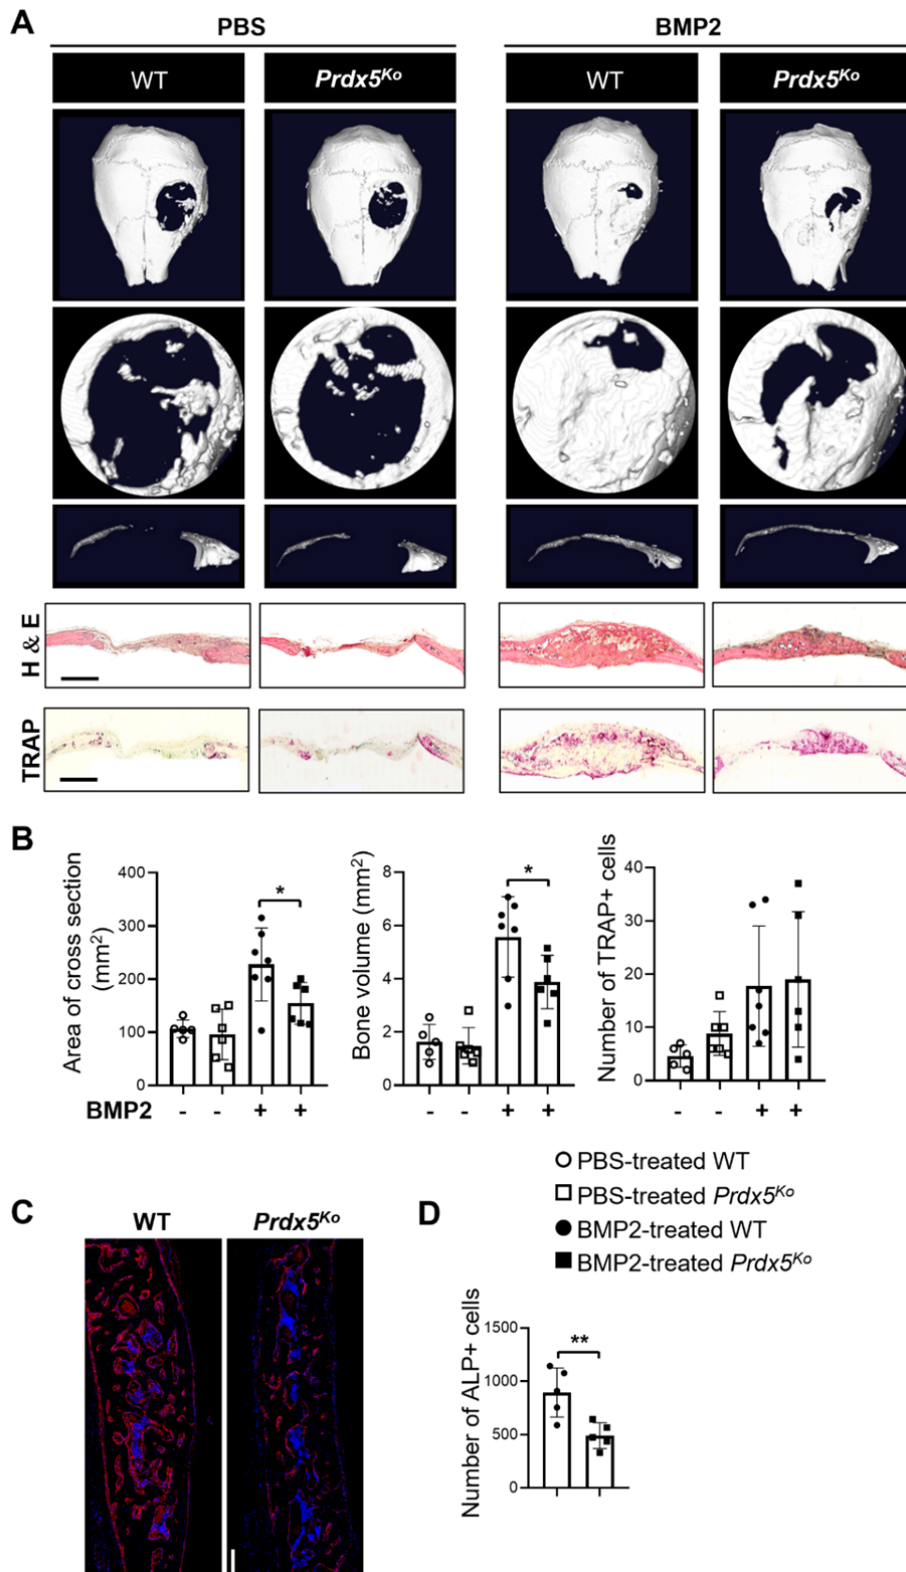

275



276 **Figure 4.** *Prdx5*<sup>Ko</sup> mice show reduced bone healing after BMP2 induction. (A)  
277 Representative micro-CT images of the calvarial defect model after 3 weeks of implantation  
278 with PBS- or BMP2-containing sponges. The representative images show various shapes:  
279 whole (top), the hole from each image (middle); and the cross-section (bottom) from each  
280 hole. Representative hematoxylin–eosin and TRAP staining images of the calvarial bone  
281 section from each group. Scale bar, 1000  $\mu$ M. (B) Measurement of the cross-sectional area,  
282 new bone formation, and number of TRAP-positive cells at the calvarial defect site (n = 5–7).  
283 (C) Representative images of ALP staining (scale bar, 100  $\mu$ M) and (D) quantification of the  
284 number of ALP-positive cells (n = 5). ALP-positive cells were stained red, while DAPI-  
285 positive cells were counterstained blue.

286

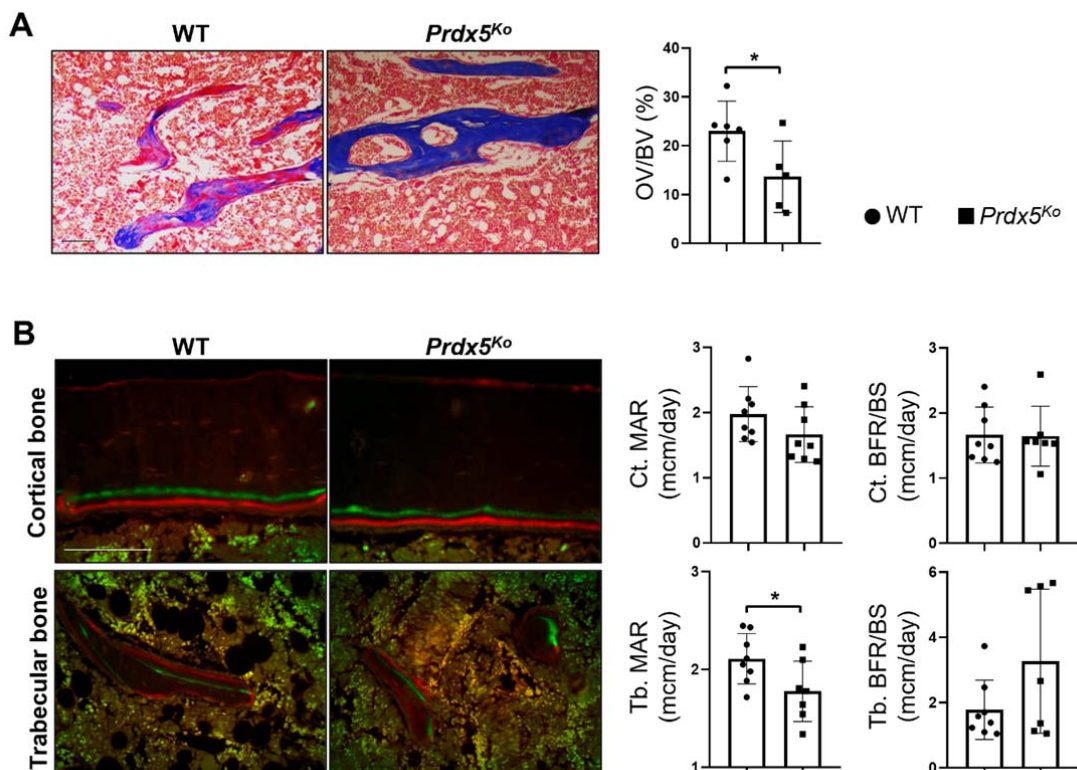

287

288 **Figure 4–figure supplement 1.** *Prdx5*<sup>Ko</sup> mice show reduced bone turnover. (A) Differential

289 staining of the bone (blue) and osteoid (red in bone) was performed using Goldner's  
290 trichrome method. The ratio of osteoid volume/bone volume (OV/BV) was measured using  
291 the Bioquant Osteo program. (B) Bone turnover parameters of the femurs from 8-week-old  
292 mice were measured via dynamic bone histomorphometry after serial injections of calcein  
293 and alizarin red S. Two-color labeled mineralized fronts, visualized via fluorescence  
294 micrography, indicated a low bone turnover with reduced MAR in the trabecular bone, but  
295 not in the cortical areas of *Prdx5<sup>ko</sup>* compared to that in WT mice. MAR: mineral apposition  
296 rate. BFR/BS: bone formation rate per bone surface. (n = 5–7). Data are presented as mean  
297 ± SEM.

298

### 299 **Prdx5 co-localizes and interacts with hnRNPK in response to BMP2 stimulation**

300 Prdx5 expression increased during osteoblast differentiation (Figure 2), which suggested  
301 that Prdx5 acts as a positive regulator of osteoblast differentiation. To understand the role of  
302 Prdx5 in osteoblasts, we investigated Prdx5-interacting proteins using LC-MS/MS after  
303 immunoprecipitation with a Prdx5 antibody using *in vitro* differentiated osteoblasts (Figure  
304 5A). We identified a total of 43 Prdx5-associated proteins (Table 1). In Gene Ontology (GO)  
305 analysis with these 43 proteins, RNA splicing was found to be the only significant biological  
306 pathway, suggesting the involvement of Prdx5 through an RNA-related mechanism (Figure  
307 5B). To determine the interacting proteins responsive to BMP2, we focused on BMP2-  
308 specific proteins. A total of 20 proteins were classified as BMP2-specific interacting proteins  
309 (Figure 5A and Table 2). Since Prdx5 was localized in the nucleus after BMP2 stimulation  
310 (Figure 5–figure supplement 1), and to understand the function of Prdx5 in cell differentiation,  
311 we focused on nuclear proteins, hnRNPs. hnRNPK was found to be close to Prdx5 via  
312 STRING analysis (Figure 5C); this protein has previously been studied in osteoclasts and  
313 osteoblasts (Fan et al., 2015; Stains et al., 2005). Here, we confirmed the localization of  
314 Prdx5 and hnRNPK at the single-cell level (Figure 6A). After BMP2 stimulation, Prdx5 and

315 hnRNPk were co-localized in the nucleus and cytosol in osteoblasts. We also confirmed the  
316 interaction between Prdx5 and hnRNPk using immunoprecipitation (Figure 6B). To clarify  
317 the relationship between Prdx5 and hnRNPk, we compared hnRNPk localization in *Prdx5*<sup>Ko</sup>  
318 cells after BMP2 stimulation. Interestingly, hnRNPk was localized only in the nucleus in  
319 *Prdx5*<sup>Ko</sup> cells, whereas it was observed in the cytosol and nucleus in WT (Figure 6C). To  
320 verify the microscopic data, the levels of hnRNPk were examined in the nuclear and  
321 cytoplasmic fractions of *Prdx5*<sup>Ko</sup> osteoblasts (Figure 6D). Higher levels of hnRNPk were  
322 detected in the nuclear fraction of *Prdx5*<sup>Ko</sup> osteoblasts than in that of the WT osteoblasts; the  
323 expression was similar in the absence of BMP2. These data suggest that Prdx5 may control  
324 the localization of hnRNPk in osteoblasts.

325 In osteoblasts, previous studies have reported the role of hnRNPk as a repressor of *Ocn*  
326 expression (Niger et al., 2011; Stains et al., 2005). Since Prdx5 acted as an activator of  
327 osteoblast differentiation in our study, and *Ocn* levels were attenuated in osteoblasts from  
328 *Prdx5*<sup>Ko</sup> mice (Figure 2C), we assumed that Prdx5 inhibits hnRNPk to regulate *Ocn*. We  
329 performed a reporter assay using *Ocn* promoter to verify whether Prdx5 affects *Ocn*  
330 expression (Figure 6E). We found that Prdx5 knockdown suppressed the *Ocn* activity that  
331 was rescued by Prdx5 overexpression. Altogether, these results indicate that Prdx5 interacts  
332 with hnRNPk in osteoblasts to transport hnRNPk from the nucleus to cytoplasm, which  
333 activates *Ocn* to induce osteoblast differentiation.

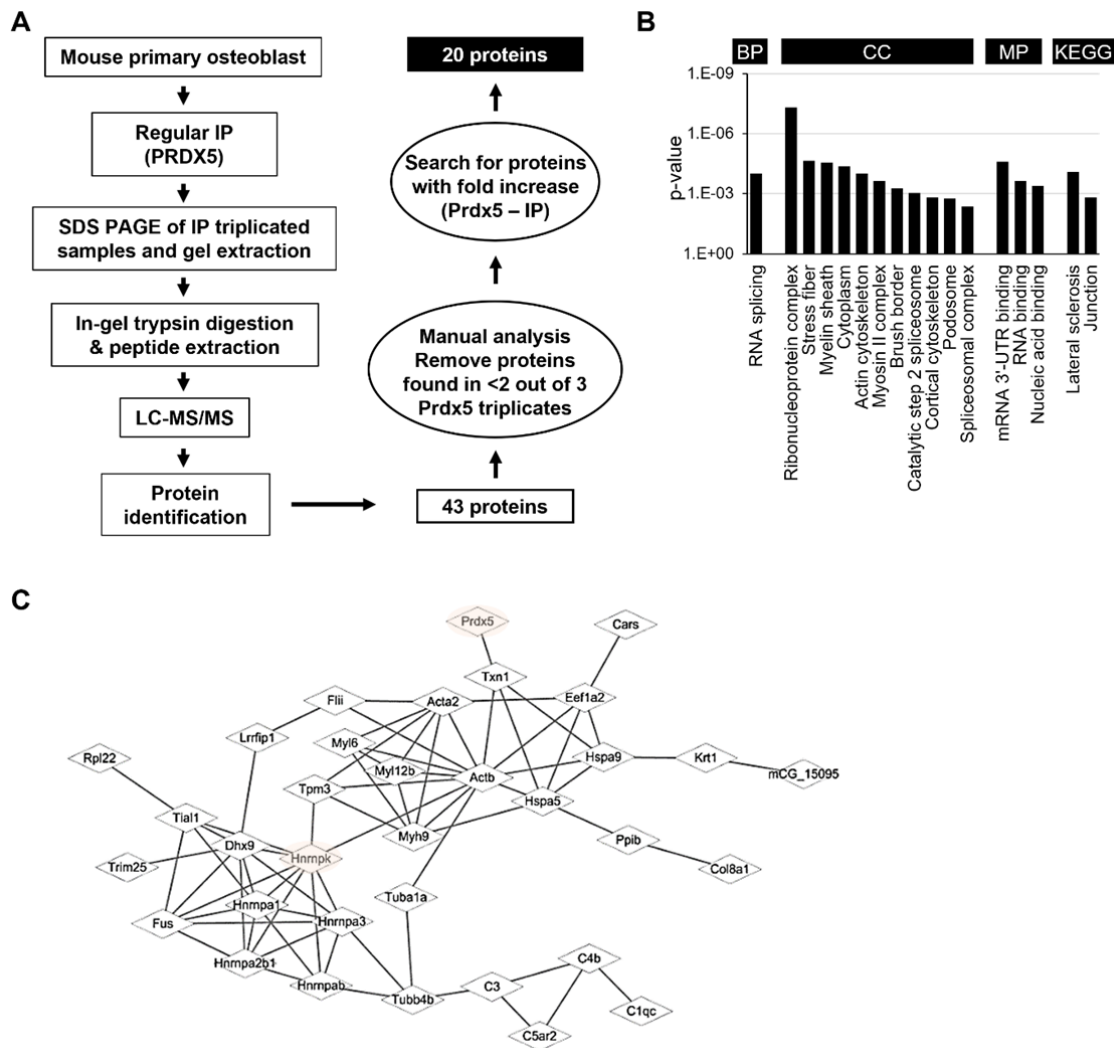

334

335 **Figure 5.** Identification of Prdx5-interacting proteins during osteoblast differentiation. (A)  
 336 Schematic representation of the experimental design of IP and LC-MS/MS. Total 20 proteins  
 337 were identified as potential candidates binding to Prdx5 in osteoclasts. (B) GO analysis  
 338 results with 43 proteins are shown by biological process (BP), cellular component (CC),  
 339 molecular function (MF), and Kyoto encyclopedia of genes and genomes (KEGG). (C) The  
 340 interaction of Prdx5 with the 43 proteins identified in the MS/MS analysis was constructed  
 341 using the STRING database.

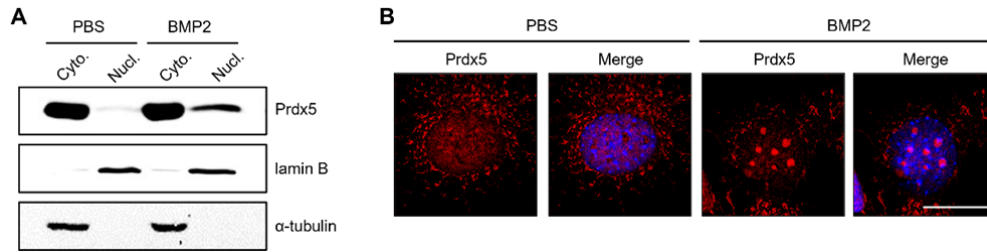

342

343 **Figure 5-figure supplement 1.** BMP2 induces nuclear translocation of Prdx5. (A) Western  
 344 blot analysis of Prdx5 in the cytoplasmic and nuclear fractions of osteoblasts treated with  
 345 BMP2 for 4 days. (B) Fixed osteoblasts after 4 days of BMP2 treatment were stained with an  
 346 anti-Prdx5 antibody (red) and imaged using confocal microscopy. The nucleus was  
 347 counterstained in blue. Scale bar, 20  $\mu$ m

348 **Table 1.** The 43 Prdx5-interacting proteins identified via LC-MS/MS analysis

| Accession  | Description                                                     | Gene                    | Localization        | Mol%   |        |        |        |        |        |
|------------|-----------------------------------------------------------------|-------------------------|---------------------|--------|--------|--------|--------|--------|--------|
|            |                                                                 |                         |                     | CTRL_1 | CTRL_2 | CTRL_3 | BMP2_1 | BMP2_2 | BMP2_3 |
| P99029     | Peroxisome oxidin-5, mitochondrial                              | PRDX5                   | Cytoplasm           | 39.2   | 56.8   | 48.88  | 34.58  | 30.27  | 31.835 |
| O6ZWQ9     | MCG5400                                                         | MYL12B                  | Cytoplasm           |        |        |        |        | 5.799  | 7.595  |
| P62737     | Actin, aortic smooth muscle                                     | ACTA2                   | Cytoplasm           |        |        |        |        | 7.174  | 6.615  |
| P10639     | Thioredoxin                                                     | TXN                     | Cytoplasm           |        | 3.156  | 2.302  | 5.176  | 3.243  | 3.411  |
| Q8VDD5     | Myosin-9                                                        | MYH9                    | Cytoplasm           |        |        |        | 3.059  | 2.31   | 3.204  |
| A0A075B5L7 | Immunoglobulin k variable 4-80 (Fragment)                       | IGKV4-80                | Other               | 5.422  | 6.638  |        |        | 2.118  | 2.998  |
| A0A0B4J1K5 | Immunoglobulin lambda variable 3 (Fragment)                     | IgLTV3                  | Other               | 2.222  | 2.72   | 1.984  | 1.961  | 1.229  | 2.946  |
| O88569     | Heterogeneous nuclear ribonucleoproteins A2/B1                  | HNRNPA2B1               | Nucleus             |        | 0.979  |        |        | 2.604  | 2.739  |
| Q8CFQ9     | Fusion, derived from t(1216) malignant liposarcoma              | FUS                     | Nucleus             | 0.533  | 0.653  | 0.476  |        |        | 1.809  |
| P04104     | Keratin, type II cytoskeletal 1                                 | KRT1                    | Cytoplasm           | 3.556  | 2.938  | 2.143  | 1.647  | 1.327  | 1.395  |
| E9Q1Z0     | Keratin 90                                                      | KRT90                   | Cytoplasm           | 2.133  |        | 2.46   |        | 1.523  | 1.24   |
| P67984     | 60S ribosomal protein L22                                       | RPL22                   | Cytoplasm           |        |        |        | 1.804  |        | 1.189  |
| A0A1W2P6G5 | Myosin light polypeptide 6                                      | MYL6                    | Cytoplasm           |        |        |        | 3.765  | 1.081  | 1.137  |
| Q9JJ28     | Protein flightless-1 homolog                                    | FLII                    | Nucleus             | 0.622  | 0.762  | 1.111  | 1.098  | 0.688  | 1.137  |
| P68369     | Tubulin alpha-1A chain                                          | TUBA1A                  | Cytoplasm           |        |        |        | 2.902  | 1.032  | 1.085  |
| P21107     | Tropomyosin alpha-3 chain                                       | TPM3                    | Cytoplasm           |        |        |        |        | 1.032  | 1.085  |
| Q20BD0     | Heterogeneous nuclear ribonucleoprotein A/B                     | HNRNPAB                 | Nucleus             | 0.8    | 2.607  | 0.714  |        | 0.934  | 0.982  |
| Q5EBP8     | Heterogeneous nuclear ribonucleoprotein A1                      | HNRNPA1                 | Nucleus             |        |        |        |        | 0.885  | 0.93   |
| P70318     | Nucleolysin TIAR                                                | TIAL1                   | Nucleus             | 0.711  | 0.871  |        |        | 1.179  | 0.827  |
| B2M1R6     | Heterogeneous nuclear ribonucleoprotein K                       | HNRNPK                  | Nucleus             |        |        |        |        | 1.081  | 0.724  |
| P20029     | Endoplasmic reticulum chaperone BiP                             | HSPA5                   | Cytoplasm           | 0.444  |        | 0.714  |        | 0.688  | 0.724  |
| P38647     | Stress-70 protein, mitochondrial                                | HSPA9                   | Cytoplasm           | 2.133  |        | 0.714  |        | 0.442  | 0.724  |
| P68372     | Tubulin beta-4B chain                                           | TUBB4B                  | Cytoplasm           |        |        |        | 1.098  |        | 0.724  |
| Q9CPN9     | Complement C1q subcomponent subunit C                           | C1QC                    | Extracellular Space | 1.156  | 1.415  | 1.032  |        | 0.639  | 0.672  |
| Q02105     | RIKEN cDNA 2210010C04 gene                                      | 2210010C04Rik           | Extracellular Space | 1.067  | 1.306  | 0.952  | 0.941  | 0.59   | 0.62   |
| A0A087VNU6 | Leucine-rich repeat flightless-interacting protein 1 (Fragment) | LRRFIP1                 | Cytoplasm           |        |        |        | 0.392  | 0.491  | 0.517  |
| Q8BG05-2   | Isoform 2 of Heterogeneous nuclear ribonucleoprotein A3         | HNRNPA3                 | Nucleus             |        |        |        |        | 0.934  | 0.465  |
| A0A1D5RLD8 | Glyceraldehyde-3-phosphate dehydrogenase                        | GM10358                 | Other               |        |        |        |        | 0.442  | 0.465  |
| P62631     | Elongation factor 1-alpha2                                      | EEF1A2                  | Cytoplasm           |        |        |        |        | 0.295  | 0.31   |
| P01029     | Complement C4-B                                                 | C4A/C4B                 | Extracellular Space | 0.267  | 0.326  | 0.397  | 0.235  | 0.147  | 0.258  |
| F7DBB3     | AHNAK nucleoprotein 2 (Fragment)                                | AHNAK2                  | Cytoplasm           | 0.178  | 0.435  | 0.476  |        | 0.393  | 0.207  |
| Q00780     | Collagen alpha-1(VIII) chain                                    | COL8A1                  | Extracellular Space |        |        | 0.714  |        | 0.197  | 0.207  |
| Q61510     | E3 ubiquitin/ISG15 ligase TRIM25                                | TRIM25                  | Cytoplasm           |        |        |        |        |        |        |
| P01027     | Complement C3                                                   | C3                      | Extracellular Space | 0.622  | 0.544  | 0.397  |        | 0.098  | 0.207  |
| P60710     | Actin, cytoplasmic 1                                            | ACTB                    | Cytoplasm           |        |        |        | 14.745 | 8.206  |        |
| Q9Z1R9     | Melanoma inhibitory activity protein 2 (Fragment)               | PRSS1 (includes others) | Extracellular Space | 2.311  |        | 2.063  |        | 1.278  |        |
| H3BJ55     | Melanoma inhibitory activity protein 2 (Fragment)               | MIA2                    | Cytoplasm           |        |        |        | 0.863  | 0.541  |        |
| O70133     | ATP-dependent RNA helicase A                                    | DHX9                    | Nucleus             |        |        |        | 0.157  | 0.197  |        |
| P24369     | Peptidyl-prolyl cis-trans isomerase B                           | PIIB                    | Cytoplasm           | 13.511 | 10.12  | 12.063 |        |        |        |
| F6T9C3     | Translation initiation factor eIF-2B subunit epsilon (Fragment) | EIF2B5                  | Cytoplasm           |        | 1.959  | 1.429  |        |        |        |
| Q8QZT1     | Acetyl-CoA acetyltransferase, mitochondrial                     | ACAT1                   | Cytoplasm           | 1.333  |        | 0.556  |        |        |        |
| Q9ER72     | Cysteine-tRNA ligase, cytoplasmic                               | CARS                    | Cytoplasm           | 0.267  |        | 0.238  |        |        |        |
| P56480     | ATP synthase subunit beta, mitochondrial                        | ATP5F1B                 | Cytoplasm           | 1.067  | 1.306  |        |        |        |        |

349

350

351 **Table 2.** Prdx5-interacting proteins detected only in the BMP2-treated group

| Accession  | Description                                                     | Gene      | Localization        | Avg of mol% |
|------------|-----------------------------------------------------------------|-----------|---------------------|-------------|
| Q8VDD5     | Myosin-9                                                        | MYH9      | Cytoplasm           | 2.858       |
| A0A1W2P6G5 | Myosin light polypeptide 6                                      | MYL6      | Cytoplasm           | 1.994       |
| P68369     | Tubulin $\alpha$ -1A chain                                      | TUBA1A    | Cytoplasm           | 1.673       |
| A0A087WNU6 | Leucine-rich repeat flightless-interacting protein 1 (Fragment) | LRRFIP1   | Cytoplasm           | 0.467       |
| P60710     | Actin, cytoplasmic 1                                            | ACTB      | Cytoplasm           | 11.48       |
| P62737     | Actin, aortic smooth muscle                                     | ACTA2     | Cytoplasm           | 6.895       |
| Q6ZWQ9     | MCG5400                                                         | MYL12B    | Cytoplasm           | 6.879       |
| O88569     | Heterogeneous nuclear ribonucleoproteins A2/B1                  | HNRNPA2B1 | Nucleus             | 2.672       |
| P67984     | 60S ribosomal protein L22                                       | RPL22     | Cytoplasm           | 1.496       |
| P21107     | Tropomyosin $\alpha$ -3 chain                                   | TPM3      | Cytoplasm           | 1.059       |
| P68372     | Tubulin $\beta$ -4B chain                                       | TUBB4B    | Cytoplasm           | 0.911       |
| Q5EBP8     | Heterogeneous nuclear ribonucleoprotein A1                      | HNRNPA1   | Nucleus             | 0.907       |
| B2M1R6     | Heterogeneous nuclear ribonucleoprotein K                       | HNRNPK    | Nucleus             | 0.902       |
| H3BJS5     | Melanoma inhibitory activity protein 2 (Fragment)               | MIA2      | Cytoplasm           | 0.702       |
| Q8BG05-2   | Isoform 2 of Heterogeneous nuclear ribonucleoprotein A3         | HNRNPA3   | Nucleus             | 0.699       |
| A0A1D5RLD8 | Glyceraldehyde-3-phosphate dehydrogenase                        | GM10358   | Other               | 0.454       |
| P62631     | Elongation factor 1- $\alpha$ 2                                 | EEF1A2    | Cytoplasm           | 0.302       |
| Q00780     | Collagen $\alpha$ -1(VIII) chain                                | COL8A1    | Extracellular Space | 0.202       |
| Q61510     | E3 ubiquitin/ISG15 ligase TRIM25                                | TRIM25    | Cytoplasm           | 0.202       |
| O70133     | ATP-dependent RNA helicase A                                    | DHX9      | Nucleus             | 0.177       |

352

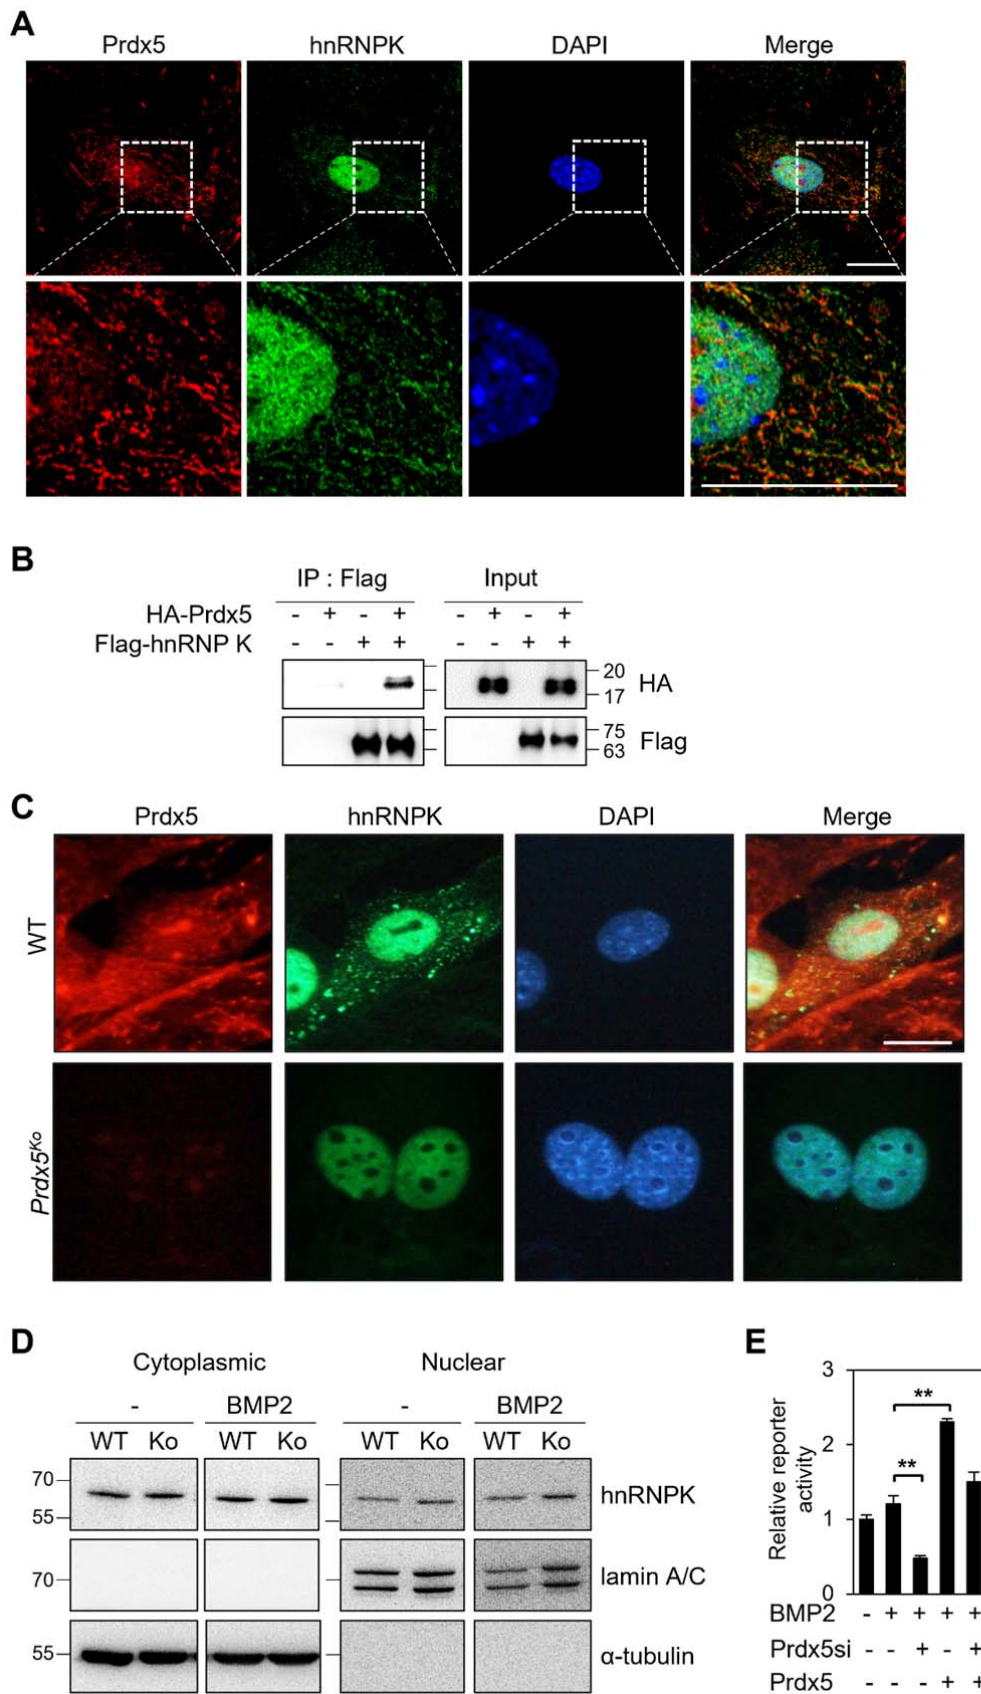

354 **Figure 6.** hnRNPK interacts with Prdx5 in osteoblasts. (A) To determine co-localization,  
355 osteoblasts were stained with antibodies against Prdx5 and hnRNPK, and images were  
356 acquired via confocal microscopy (scale bar, 20  $\mu$ m). The upper images were magnified as  
357 depicted by the dotted box in the lower images. (B) Immunoprecipitation was performed  
358 using HEK293T cells expressing various combinations of HA-tagged Prdx5 and flag-tagged  
359 hnRNPK. (C) Osteoblasts were differentiated from precursors derived from WT and *Prdx5*<sup>Ko</sup>  
360 mice via BMP2 treatment for 7 days. hnRNPK localization was analyzed via confocal  
361 microscopy (scale bar, 20  $\mu$ m). (D) hnRNPK levels were determined in the cytoplasmic and  
362 nuclear fractions of WT and *Prdx5*<sup>Ko</sup> cells. Osteoblasts were harvested on day 7. (E) The  
363 OG2-luciferase assay was performed using MC3T3-E1 cells differentially expressing Prdx5  
364 and BMP2 stimulation.

365

### 366 **Expression of osteoclast-related genes is increased in *Prdx5*<sup>Ko</sup> osteoclasts**

367 As *Prdx5*<sup>Ko</sup> mice showed an increase in the number of TRAP-positive osteoclasts in the  
368 femurs (Figure 3E), and BMMs from *Prdx5*<sup>Ko</sup> mice differentiated into more osteoclasts than  
369 those in WT (Figure 2E), we analyzed the transcriptome profiles of BMMs and osteoclasts  
370 via RNA-seq (Figure 7). BMMs were isolated from WT and *Prdx5*<sup>Ko</sup> mice, and the cells were  
371 differentiated into osteoclasts via RANKL stimulation for 4 days *in vitro*. The number of reads  
372 ranged from 72,748,470 to 86,717,526 was generated, and the trimmed clean reads were  
373 mapped to the mouse reference genome with 97–98 % alignment rates (Figure 7–table  
374 supplement 1). BMMs and osteoclasts were clearly separated by principal component  
375 analysis (PCA) (Figure 7A). However, no significant differences were observed between the  
376 BMMs of WT and *Prdx5*<sup>Ko</sup> mice. A comparison of differentially expressed genes (DEGs)  
377 between WT and *Prdx5*<sup>Ko</sup> cells revealed 214 DEGs in BMMs, whereas 1257 genes were  
378 detected in osteoclasts (Figure 7B, C). Among the 214 genes, 61 (28.5%) were upregulated



379 and 153 (71.5%) were downregulated in *Prdx5*<sup>Ko</sup> mice compared to those in WT. However,  
380 approximately half of DEGs were up- and downregulated in *Prdx5*<sup>Ko</sup> osteoclasts (51% and  
381 49%, respectively). These results suggest that Prdx5 acts as an activator of gene expression  
382 in BMMs, and the gene levels are high in osteoclast precursors. However, the levels of these  
383 genes decrease during osteoclastogenesis. In GO analysis, the DEGs were found to be  
384 involved in the immune response (Figure 7–figure supplement 1).

385 We hypothesized that *Prdx5* deficiency results in a positive regulation of osteoclast  
386 differentiation. In GO analysis, the downregulated DEGs in *Prdx5*<sup>Ko</sup> osteoclasts were  
387 involved in cell cycle regulation and cell division, while the upregulated DEGs were enriched  
388 in signaling and osteoclast differentiation (Figure 7–figure supplement 1). When we  
389 examined osteoclast-related genes, 25 out of 36 DEGs were upregulated in *Prdx5*<sup>Ko</sup>  
390 osteoclasts (Figure 7D). Interestingly, the levels of transcription factors (*NFATc1*, *Fos*, and  
391 *Irf9*) that regulated the early response of osteoclast differentiation were suppressed in  
392 *Prdx5*<sup>Ko</sup> osteoclasts. In contrast, osteoclast maker genes (*OC-STAMP*, *Calcr*, *DC-Stamp*,  
393 *Itgb3*, and *Oscar*), which are highly expressed in mature osteoclasts, were upregulated in  
394 *Prdx5*<sup>Ko</sup> osteoclasts.

395

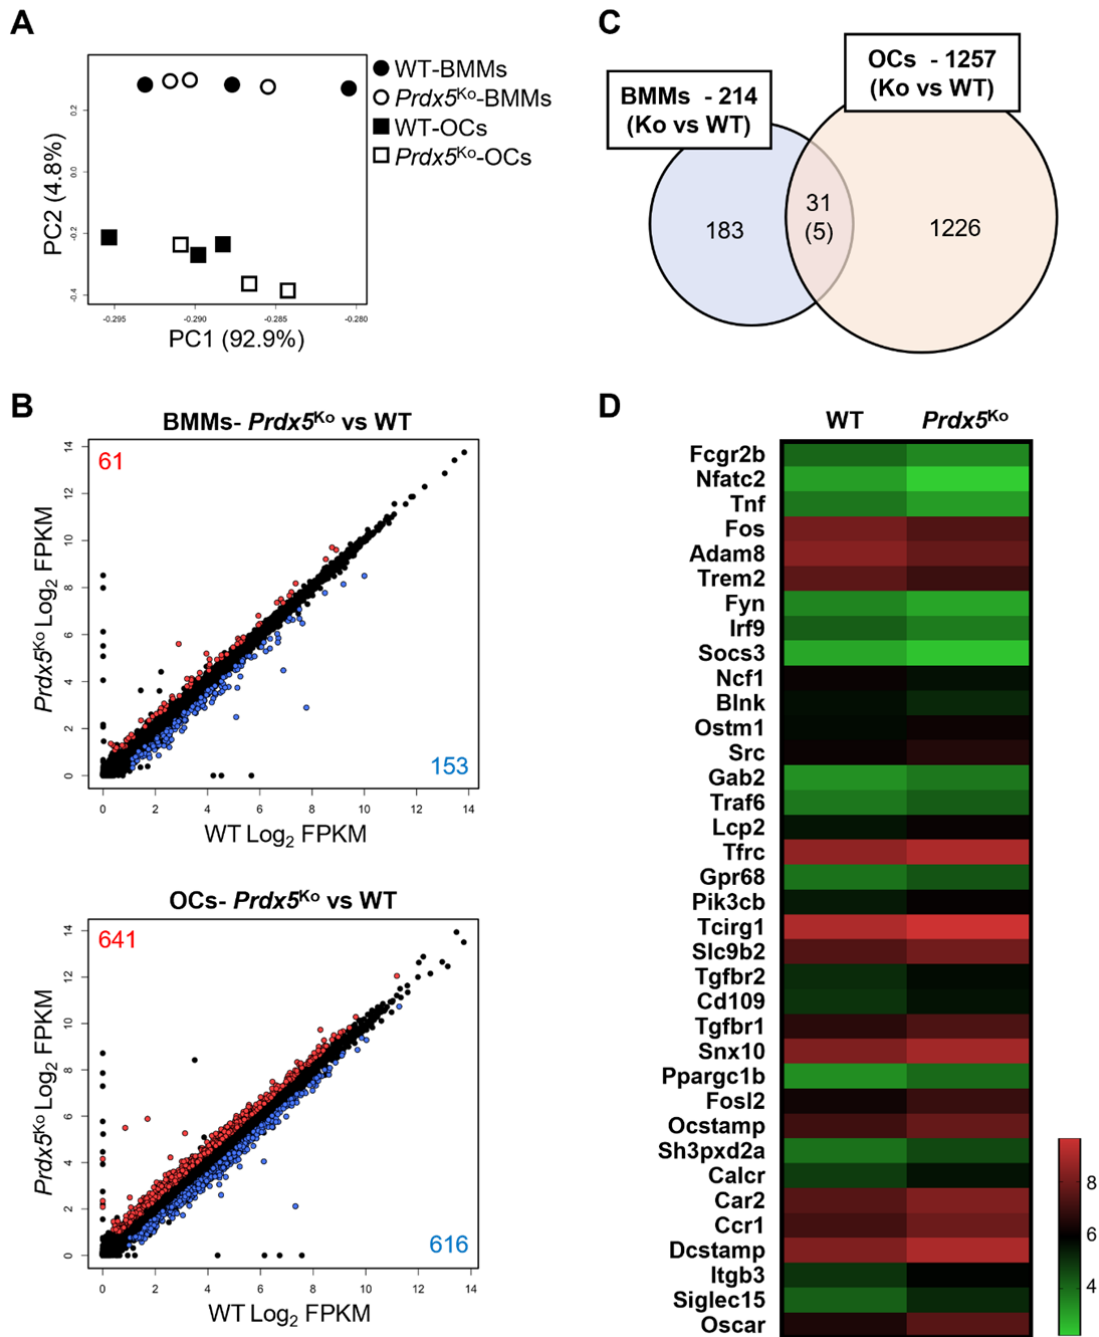

396

397 **Figure 7.** Osteoclast-related genes are highly expressed in *Prdx5*-deficient osteoclasts. (A)  
 398 PCA of BMMs and osteoclasts (OCs) from WT and *Prdx5*<sup>Ko</sup> cells. Each circle or square  
 399 represents the expression profile of one sample (n = 3). (B) The DEGs in BMMs and OCs by  
 400 comparison of *Prdx5*<sup>Ko</sup> versus WT are displayed on a scatter plot. Each dot indicates a

401 single gene. Significantly upregulated DEGs in *Prdx5*<sup>Ko</sup> are indicated in red, while  
 402 downregulated DEGs are indicated in blue (FPKM > 1, q-value < 0.05). (C) The Venn  
 403 diagram indicates DEGs in BMMs and OCs. A total of 31 DEGs are overlapped in BMMs  
 404 and OCs, and only five genes show opposite patterns, which are downregulated in *Prdx5*<sup>Ko</sup>  
 405 OCs but upregulated in *Prdx5*<sup>Ko</sup> BMMs. (D) Heatmap analysis shows the osteoclast-related  
 406 DEGs. The z-score represents log<sub>2</sub> FPKM.

407

408 **Figure 7–table supplement 1.** Statistics of RAN-seq analysis

| Original             | Number of reads (sum of pairs) | After trimmed reads | Alignment rate (%) |
|----------------------|--------------------------------|---------------------|--------------------|
| Wt_BMMs-1_Read_Count | 79,081,594                     | 77,290,554          | 97.74%             |
| Wt_BMMs-2_Read_Count | 73,952,744                     | 72,383,444          | 97.88%             |
| Wt_BMMs-3_Read_Count | 84,004,640                     | 81,523,436          | 97.05%             |
| Wt_OCs-1_Read_Count  | 75,068,812                     | 73,463,268          | 97.86%             |
| Wt_OCs-2_Read_Count  | 79,729,144                     | 77,767,782          | 97.54%             |
| Wt_OCs-3_Read_Count  | 81,017,248                     | 79,417,460          | 98.03%             |
| KO_BMMs-1_Read_Count | 77,677,924                     | 75,695,744          | 97.45%             |
| KO_BMMs-2_Read_Count | 76,958,152                     | 75,180,826          | 97.69%             |
| KO_BMMs-3_Read_Count | 73,431,784                     | 71,442,572          | 97.29%             |
| KO_OCs-1_Read_Count  | 86,717,526                     | 84,541,376          | 97.49%             |
| KO_OCs-2_Read_Count  | 81,819,488                     | 79,737,322          | 97.46%             |
| KO_OCs-3_Read_Count  | 72,748,470                     | 70,913,232          | 97.48%             |

409

410

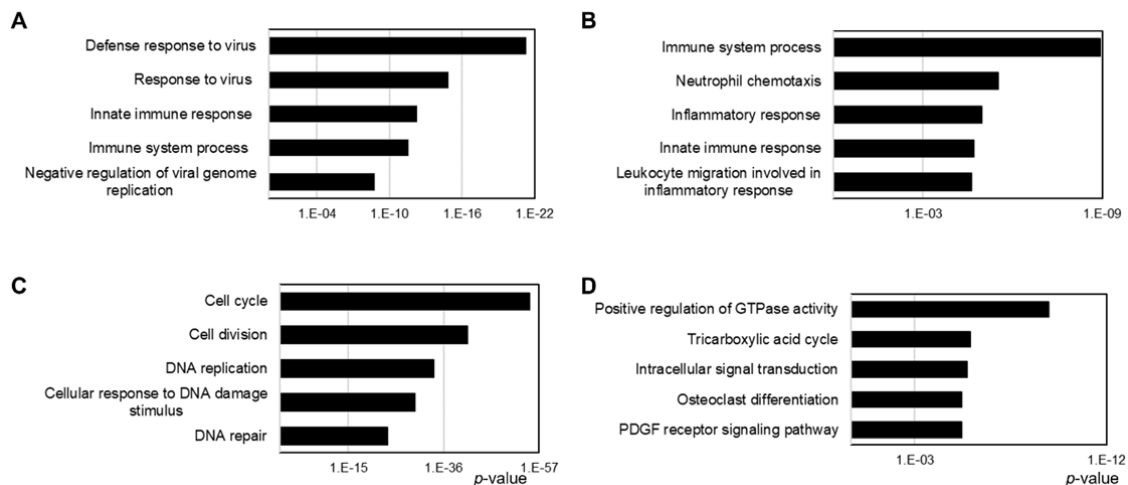

411

412 **Figure 7–figure supplement 1.** GO analysis of DEGs via RNA-seq analysis. (A) Total 153  
413 downregulated and (B) 61 upregulated DEGs in BMMs. (C) Total 616 downregulated and (D)  
414 641 upregulated DEGs in OCs. Top five biological pathways are represented by the  $p$ -value  
415 (X-axis).

416

## 417 **Discussion**

418 Osteoporosis results in an excessive reduction in bone mass, which is a major health issue  
419 in the elderly population (Demontiero et al., 2012). Clinically, some therapeutic treatments  
420 are available to induce osteoblast and reduce osteoclast activities (Milat & Ebeling, 2016).  
421 However, these treatments are associated with severe side effects, including heart issues,  
422 kidney damage, and osteonecrosis of the jaw (Compston et al., 2019; Saag et al., 2017).  
423 Therefore, a novel drug with curative and fewer side effects is urgently needed to treat  
424 osteoporosis.

425 Here, we assessed the critical functions of Prdx5 in bone homeostasis. Prdx5 expression  
426 increased during osteoblast differentiation and decreased during osteoclast differentiation.  
427 Genetically deficient *Prdx5* mice developed osteoporosis-like phenotypes, which suggests  
428 that Prdx5 is important in bone remodeling. In osteoblasts, Prdx5 and hnRNPK were co-  
429 localized in the nucleus and cytosol, and Prdx5 regulated the hnRNPK-mediated *Ocn*  
430 transcription. In osteoclasts, Prdx5 acted as an inhibitor, as revealed by the upregulation of  
431 osteoclast-related genes in *Prdx5*<sup>ko</sup> cells. We demonstrated that Prdx5 was a novel positive  
432 regulator of osteoblast differentiation, and that it also regulated osteoclastogenesis. Our  
433 study indicated the beneficial pharmacological effect of Prdx5 in the maintenance of bone  
434 mass during the formation of skeletal tissues.

435 Six members of the Prdx family reportedly exhibit antioxidant activities owing to the  
436 presence of CXXC amino acid sequences (Chae et al., 1994; Rhee et al., 2001). Prdx5 is a

437 unique member of the atypical 2-Cys subfamily in mammals and is expressed ubiquitously in  
438 all tissues (Rhee et al., 2001). Prdx5 is present in the cytosol, peroxisomes, and  
439 mitochondria (Rhee et al., 2012). *Prdx5* deficiency leads to an increased susceptibility to  
440 high-fat diet-induced obesity and metabolic abnormalities (Kim et al., 2018; Kim et al., 2020).  
441 In this study, we first investigated the changes in osteogenesis or bone mass formation by  
442 Prdx5. In addition, we confirmed the role of Prdx5 in osteogenic processes. The *Prdx5*<sup>Ko</sup>  
443 mice showed a significant reduction in bone mass, which suggested that Prdx5 affected  
444 bone turnover. *Prdx5* deficiency markedly inhibited osteoblast differentiation and increased  
445 osteoclast differentiation *in vitro*. Indeed, the bone healing rate and osteocyte population  
446 decreased in *Prdx5*<sup>Ko</sup> mice. Interestingly, Prdx5 may interact with hnRNPK in osteoblasts.  
447 Given the reduced bone mass in *Prdx5*<sup>Ko</sup> mice, we investigated the function of Prdx5 in  
448 osteoclasts. However, we did not focus on the role of Prdx5 in osteoclasts, because its  
449 expression was extremely low after RANKL stimulation. Our results imply that Prdx5  
450 primarily acts in the osteoblasts, and it may not be necessary for osteoclasts.

451 To determine the antioxidative role of Prdx5 in bone cell differentiation, we determined  
452 the ROS levels in BMP2-treated osteoblasts. ROS production was not altered by BMP2  
453 stimulation in *Prdx5*-deficient cells. We found that Prdx5 is involved in ROS generation  
454 during osteoblast differentiation, which is necessary for BMP2-mediated ROS production.  
455 However, this mechanism is an early response in the cytoplasm, which is scavenged later  
456 during osteoblastogenesis. Further studies are required to elucidate the relationship between  
457 ROS and Prdx5 in bone cells, particularly, in terms of mitochondrial functions. In this study,  
458 we primarily focused on the role of Prdx5 in the nucleus.

459 hnRNPK also interacts with numerous proteins in the nucleus and cytosol, including  
460 signal transduction proteins, transcriptional activators, and repressors (Naarmann et al.,  
461 2008; Perrotti & Neviani, 2007; Ritchie et al., 2003). Therefore, hnRNPK may act as a  
462 docking platform or scaffold, shuttling from the cytoplasm to the nucleus (Krecic & Swanson,

463 1999; Mikula et al., 2010). Prdx5 was also expressed in the cytosol and nucleus (Figure 7).  
464 Furthermore, we also examined Prdx5 translocation to the nucleus upon BMP2 induction.  
465 Our results suggested potential mechanisms through which transcriptional repression by  
466 hnRNPK may occur. The most likely scenario is that hnRNPK competitively binds to an  
467 unknown transcription factor (complex II) that binds to the putative CT-rich region of the *Ocn*  
468 promoter, resulting in the loss of an activator from the promoter and a net repression of gene  
469 transcription (Stains et al., 2005). Our results indicated that Prdx5 disturbed the binding  
470 potential of hnRNPK to suppress *Ocn* expression through an interaction between Prdx5 and  
471 hnRNPK and their translocation. hnRNPK interacts with glycogen synthase kinase-3b during  
472 osteoclast differentiation via nuclear–cytoplasmic translocation (Fan et al., 2015). Further  
473 studies may demonstrate the correlation between Prdx5 attenuation and hnRNPK  
474 translocation during osteoclastogenesis.

475 In conclusion, we identified a new mechanism of Prdx5 in regulating the hnRNPK–*Ocn*  
476 axis in osteoblasts. Our study also indicates that Prdx5 controls osteoclast differentiation,  
477 which is mediated by osteoblast differentiation or the early stages of osteoclastogenesis.  
478 Therefore, Prdx5 is critical in bone remodeling.

479

480 **Materials and Methods**

481 **Key resources table**

| Reagent type (species) or resource     | Designation                            | Source or reference                                               | Identifiers      | Additional information       |
|----------------------------------------|----------------------------------------|-------------------------------------------------------------------|------------------|------------------------------|
| Genetic Reagent ( <i>M. musculus</i> ) | C57Bl/6 J                              | Kim <i>et al.</i> , 2018                                          |                  | DBL Co. Daejeon, South Korea |
| Chemical compound                      | BMP2                                   | Sino Biological                                                   | Cat#10426        |                              |
| Chemical compound                      | Recombinant murine sRANKL              | PeproTech                                                         | Cat#315-11       |                              |
| Chemical compound                      | Recombinant murine M-CSF               | PeproTech                                                         | Cat#315-02       |                              |
| Chemical compound                      | Type I collagenase                     | Gibco                                                             | Cat#17018        |                              |
| Chemical compound                      | Dispase                                | Roche                                                             | Cat#4942078001   |                              |
| Chemical compound                      | BCIP/NBT alkaline phosphatase kit      | Sigma-Aldrich                                                     | Cat#B1911        |                              |
| Chemical compound                      | CM-H2DCFDA                             | Thermo Fisher Scientific                                          | Cat#MP36103      |                              |
| Chemical compound                      | Calcein                                | Sigma-Aldrich                                                     | Cat#C0875        |                              |
| Chemical compound                      | Alizarin S Red                         | Sigma-Aldrich                                                     | Cat#A5533        |                              |
| Chemical compound                      | Prdx5 siRNA                            | Thermo Fisher Scientific                                          | Cat#s79839-41    |                              |
| Chemical compound                      | Lipofectamine 3000                     | Invitrogen                                                        | Cat#L3000001     |                              |
| Chemical compound                      | Hematoxylin                            | Sigma-Aldrich                                                     | Cat#H9627        |                              |
| Chemical compound                      | Bouin's solution                       | Sigma-Aldrich                                                     | Cat#HT10132      |                              |
| Chemical compound                      | Acid Fuchsin                           | Sigma-Aldrich                                                     | Cat#F-8129       |                              |
| Chemical compound                      | Aniline blue                           | Junsei                                                            | Cat#11466        |                              |
| Chemical compound                      | Phosphomolybdic acid hydrate           | Junsei                                                            | Cat#84235        |                              |
| Chemical compound                      | Phosphotungstic acid hydrate           | Junsei                                                            | Cat#84220        |                              |
| Chemical compound                      | Fast Green FCF                         | Sigma-Aldrich                                                     | Cat#7252         |                              |
| Commercial assay or kit                | TRAP Staining Kit                      | Cosmo Bio Co.                                                     | Cat#PMC-AK04-COS |                              |
| Commercial assay or kit                | SYBR Green Master mix                  | Thermo Fisher Scientific                                          | Cat#A25778       |                              |
| Commercial assay or kit                | Reverse transcription kit              | Thermo Fisher Scientific                                          | Cat#18064022     |                              |
| Commercial assay or kit                | Mouse RANKL ELISA                      | Abcam                                                             | Cat#ag100749     |                              |
| Commercial assay or kit                | Mouse OPG ELISA                        | R&D systems                                                       | Cat#MOP00        |                              |
| Commercial assay or kit                | Mouse BMP2 ELISA                       | LS bio                                                            | Cat#LS-F36595    |                              |
| Commercial assay or kit                | Bone Resorption assay kit              | Cosmo Bio Co.                                                     | Cat#CSR-BRA      |                              |
| Commercial assay or kit                | Nuclear and cytoplasmic extraction kit | Thermo Fisher Scientific                                          | Cat#78833        |                              |
| Commercial assay or kit                | Luciferase assay system                | Promega                                                           | Cat#E1500        |                              |
| Antibody                               | Mouse monoclonal anti-Prdx5            | Invitrogen                                                        | Cat#LF-MA0002    | (1:1000)                     |
| Antibody                               | Rabbit polyclonal anti-Prdx5           | Ab Frontier                                                       | Cat#LF-PA0010    | (1:500)                      |
| Antibody                               | Rabbit polyclonal anti-hnRNPK          | Cell Signaling Technology                                         | Cat#9081         | (1:1000)                     |
| Antibody                               | Mouse monoclonal anti-beta actin       | Sigma                                                             | Cat#A5441        | (1:1000)                     |
| Antibody                               | Anti-ALP                               | Abcam                                                             | Cat#ab229126     | (1:200)                      |
| Antibody                               | HA-Tag                                 | Santa Cruz                                                        | Cat#sc-7392      | (1:1000)                     |
| Antibody                               | Flag (OctA)-probe                      | Santa Cruz                                                        | Cat#sC-166355    | (1:1000)                     |
| Antibody                               | Lamin A/C                              | Cell Signaling Technology                                         | Cat#2032         | (1:1000)                     |
| Antibody                               | Lamin B                                | Ab Frontier                                                       | Cat#LF-PA50043   | (1:1000)                     |
| Antibody                               | Tubulin alpha                          | Novus                                                             | Cat#NB110        | (1:1000)                     |
| Antibody                               | Anti rabbit Alexa Fluor 488            | Thermo Fisher Scientific                                          | Cat#A-32731      | (1:200)                      |
| Antibody                               | Anti mouse Alexa Fluor 555             | Thermo Fisher Scientific                                          | Cat#A-21427      | (1:200)                      |
| Software Algorithm                     | Graphpad 8                             | <a href="https://www.graphpad.com/">https://www.graphpad.com/</a> |                  |                              |

482

483

#### 484 **Animal experiments**

485 All animals were housed in a specific pathogen-free facility following the guidelines provided  
486 in the Guide for the Care and Use of Laboratory Animals (Chonnam National University,  
487 Gwangju, Korea). All animal experiments were approved by the Institutional Animal Care  
488 and Use Committee (IACUC) of Chonnam National University (Approval No. CNU IACUC-  
489 YB-2019-50, CNU IACUC-YB-2017-53), Gwangju, Republic of Korea.

490 *Prdx5*<sup>Ko</sup> (C57BL/6J) mice were gifted by Dr. Hyun-ae Woo, Ewha Womans University,  
491 Republic of Korea (Kim et al., 2018). To obtain the WT and transgenic mice, heterozygous  
492 males and females were crossed, and littermates were used for experiments.

493 Eight-week-old WT and their transgenic female littermates were sham-operated or

494 subjected to bilateral OVX under anesthesia (25 mg/kg Zoletil and 12.5 mg/kg Rompun). The  
495 mice were sacrificed after 4 weeks, and serum, uterus, and femurs were collected for  
496 biochemical and histomorphometric analyses.

497

#### 498 **Osteoclast and osteoblast differentiation *in vitro***

499 Primary mouse pre-osteoblasts were isolated from the calvaria of 3-day-old C57BL/6J mice  
500 via sequential digestion with type I collagenase (Gibco) and dispase (Roche), as previously  
501 described (Bellows et al., 1986). Briefly, the cells were cultured in an  $\alpha$ -minimum essential  
502 medium ( $\alpha$ -MEM), containing 10% characterized heat-inactivated fetal bovine serum (FBS)  
503 and 1% penicillin/streptomycin, and differentiated into osteoblasts via treatment with 100  
504 ng/mL BMP-2 (Sino Biological). Cells were harvested at indicated time periods, and ALP  
505 staining was performed on day 7. For ALP staining, cells were fixed in 70% ethanol for 1 h  
506 and stained for 10 min with an ALP staining solution (BCIP/NBT alkaline phosphatase kit,  
507 Sigma-Aldrich), according to the manufacturer's instructions.

508 For *in vitro* osteoclast differentiation, bone marrow-derived macrophage cells were  
509 isolated and stimulated with 30 ng/mL M-CSF (PeproTech) and 50 ng/mL RANKL  
510 (PeproTech) as previously described (Cho et al., 2021). To assess the extent of  
511 differentiation, the cells were stained using a TRAP kit (Cosmo Bio Co.). The mature  
512 osteoclasts were counted under a microscope based on the number of nuclei ( $n \geq 3$ ), cell  
513 size, and cell number.

514

#### 515 **Western blot analysis and qRT-PCR**

516 The differentiated osteoblasts and osteoclasts were lysed in a radioimmune assay  
517 precipitation buffer (Thermo Scientific), and western blotting was performed as described  
518 previously (Cho et al., 2021). Mouse anti-Prdx5 (Invitrogen), rabbit anti-hnRNPK (CST),



519 rabbit anti-Lamin  $\beta$  (Ab Frontier), and mouse anti- $\beta$ -Actin (Sigma-Aldrich) antibodies were  
520 used to detect proteins.

521 Total RNA was extracted using TRIzol reagent (Thermo Fisher Scientific), and cDNA was  
522 synthesized as previously described (Cho et al., 2021). Quantitative PCR was performed  
523 using a SYBR Green-based system (Thermo Fisher Scientific), and data were calculated  
524 using the  $2^{-\Delta\Delta CT}$  method. Three separate experiments were performed. The primers used are  
525 listed in Table 3.

526

527 **Table 3.** Primer sequences for qRT-PCR

| Gene         | Primer Sequence (5' to 3') |                            |
|--------------|----------------------------|----------------------------|
|              | Forward                    | Reverse                    |
| <i>Prdx1</i> | GCATTGAGCAGCCAGAAGAAA      | ATCCATCCCCAGCCCTGTAG       |
| <i>Prdx2</i> | CAATGTGGATGACAGCAAGGA      | TTCAGGCTCACCGATGTTTACC     |
| <i>Prdx3</i> | TGCTGTTGTCAATGGAGAGTTCA    | CAAAGGGTAGAAGAAAAGCACCAA   |
| <i>Prdx4</i> | TTGGTTCAAGCCTTCCAGTACA     | ATTATTGTTTCACTACCAGGTTTCCA |
| <i>Prdx5</i> | ATTGGATGATTCTTTGGTGTCTCT   | CTTCACTATGCCGTTGTCTATCAC   |
| <i>Prdx6</i> | CCTGATCAGAAAACCGTTGTCA     | AGGAAGCATGCCTGTGCAAT       |
| <i>Runx2</i> | ACTATGGCGTCAAACAGCCT       | GGTGCTCGGATCCCCAAAAGA      |
| <i>Alp</i>   | TGGCCTGGATCTCATCAGTATTT    | AGTTCAGTGCGGTTCCAGACA      |
| <i>Ocn</i>   | AGAGAGGCAGGGAGGATCAAGT     | GGACCTGTGCTGCCCTAAAG       |
| <i>CtsK</i>  | AGGGAAGCAAGCACTGGATA       | GCTGGCTGGAATCACATCTT       |
| <i>Acp5</i>  | CAGCTGTCCTGGCTCAAAA        | ACATAGCCCACACCGTTCTC       |
| <i>c-Fos</i> | CGAAGGGAACGGAATAAGATG      | GCTGCCAAAATAAACTCCAG       |

528

529

### 530 **Micro-CT analysis**

531 Femoral specimens were fixed in a 4% paraformaldehyde solution for 12 h at 4 °C, and  
532 micro-CT imaging was performed using a high-resolution Skyscan 1172 system (Bruker-  
533 micro-CT, Kontich, Belgium). The images were acquired at a 7  $\mu$ m voxel resolution, with a  
534 0.5 mm aluminum filter, at 50 kV and 100  $\mu$ A exposure time, 0.5° rotation, and frame  
535 averaging of 1. An image reconstruction software (NRecon; Bruker) was used to reconstruct

536 serial cross-section images using identical thresholds for all samples. For measuring the  
537 regions of interest (ROIs) of the trabecular and cortical bones, we included ROIs that were  
538 0.7–2.3 mm away from the bottom of the growth plate. The bone morphometric parameters  
539 were calculated using adaptive thresholding (the mean of the minimum and maximum values)  
540 with CT Analyzer (version 1.11.8.0).

541

#### 542 **Histology, immunostaining, and dynamic bone histomorphometry**

543 Dynamic bone histomorphometric analysis was performed after injecting 25 mg/kg calcein or  
544 alizarin red (AR) into mice as previously described (Lim et al., 2015). Briefly, the distal  
545 femurs were fixed in a 4% paraformaldehyde solution and subsequently dehydrated with  
546 graded ethanol solutions; the undecalcified femurs were embedded in methyl methacrylate  
547 to prepare resin blocks. The resin blocks were cut longitudinally into 6  $\mu\text{m}$  slices of the femur  
548 distal metaphysis using a Leica SP1600 microtome (Leica Microsystems, Germany).  
549 Fluorescence signals of calcein and AR from the ROIs were captured using a fluorescence  
550 microscope (Q500MC, Leica Microsystems). The parameters for dynamic bone  
551 histomorphometry were determined using the Bioquant Osteo 2018ME program (Bioquant  
552 Osteo, Nashville, TN, USA).

553 Goldner's trichrome staining was performed on paraffin-embedded sections of 3  $\mu\text{m}$  in  
554 length. After rehydration, the slides were washed in distilled water, refixed in Bouin's solution  
555 (Sigma-Aldrich) for 15 min at 56 °C, and rinsed with running tap water for 5 min to remove  
556 picric acid (yellow color). The slides were counterstained with Weigert's hematoxylin (Sigma-  
557 Aldrich) for 10 min, washed with tap water for 5 min, and rinsed thrice with distilled water.  
558 The slides were then stained with Biebrich scarlet-acid fuchsin (Sigma-Aldrich) for 5 min and  
559 rinsed thrice with distilled water. Next, the slides were immersed in  
560 phosphotungstic/phosphomolybdic acid (Junsei) for 10 min and transferred to aniline blue

561 solution (Junsei) for 5 min. Finally, the slides were washed with distilled water and treated  
562 with 1% acetic acid for 1 min. After dehydration and mounting, the stained bone sections  
563 were observed under a microscope (Q500MC, Leica Microsystems), and the parameters of  
564 osteoid volume/bone volume were determined using the Bioquant Osteo 2018ME program  
565 (Bioquant Osteo).

566 Osteoclasts and osteoblasts were visualized using TRAP and ALP staining, respectively.  
567 TRAP (TRAP Staining Kit, Cosmo Bio Co.) staining was carried out according to the  
568 manufacturer's instructions, with some modifications. NBT/BCIP staining (Sigma-Aldrich)  
569 was carried out by incubating tissue sections. The sections were then counterstained with  
570 0.05 % Fast Green FCF (Sigma-Aldrich), dehydrated using graded ethanol solutions, and  
571 allowed to dry without clearing in xylene before mounting. Positive cells were visualized by  
572 purple color and analyzed using the ImageJ software.

573

#### 574 **Enzyme-linked immunosorbent assay (ELISA)**

575 The levels of specific markers of osteogenesis in the serum were measured using ELISA  
576 according to manufacturer's description. RANKL levels were measured using a mouse  
577 RANKL ELISA kit (Abcam); OPG levels were measured using a Quantikine ELISA (R&D  
578 system) kit; BMP2 levels were measured using mouse BMP2 ELISA kits, respectively (LS  
579 Bio).

580

#### 581 **Measurement of intracellular ROS levels**

582 For osteoblasts, calvarial cells from WT and *Prdx5*<sup>Ko</sup> mice were cultured for two days in a  
583 medium containing BMP2. For osteoclasts, BMMs from WT and *Prdx5*<sup>Ko</sup> mice were cultured  
584 for two days in a medium containing M-CSF and RANKL. The cells were washed with  $\alpha$ -  
585 MEM lacking phenol red and then incubated with 10  $\mu$ M CM-H<sub>2</sub>DCFDA (Thermo Fisher

586 Scientific) for 30 min. Fluorescence intensity was measured using a multiplate reader  
587 (SpectraMax i3x, Molecular Devices) and visualized under a microscope (Olympus Corp.,  
588 IX2-ILL100) at excitation and emission wavelengths of 490 and 520 nm, respectively.

589

#### 590 **Calvarial bone defect models and micro-CT analysis**

591 For the calvarial bone defect model, a critical size calvarial defect was created using a 5 mm  
592 diameter trephine bur (Fine Science Tools, Foster City, CA, USA) and covered with  
593 absorbable collagen sponges containing 300 ng BMP-2 (Cowell Medi Corp., Seoul, Republic  
594 of Korea) in 12-week-old *Prdx5<sup>Ko</sup>* and WT C57BL6/J male mice. After three weeks, the  
595 model mice were sacrificed for analysis. Briefly, the mice were subjected to inhalational  
596 anesthesia using an XGI-8 Gas Anesthesia System (PerkinElmer, Waltham, MA, USA)  
597 containing a mixture of 4% isoflurane (ISOTROY 100, Troikaa, India) and oxygen, for 4 min.  
598 The osteological structures of the specimens were examined using a micro-CT scanning  
599 system, combined with a Quantum GX  $\mu$ CT imaging system (PerkinElmer), at the Korea  
600 Basic Science Institute (Gwangju, Republic of Korea). The scanned skeletal data were  
601 reconstructed into 3D tomograms comprising high-contrast images of the skeletal parts of  
602 interest.

603

#### 604 **Confocal microscopy**

605 The cells were grown on sterilized glass coverslips and fixed in 4% paraformaldehyde. Non-  
606 specific binding was blocked by incubation of slides in 0.1% bovine serum albumin in PBS.  
607 Subsequently, the samples were stained with mouse anti-Prdx5 (1:200, Invitrogen) and  
608 rabbit anti-hnRNPK antibodies (1:200, Cell Signaling Technology), followed by incubation  
609 with Alexa 555- or Alexa 488-conjugated secondary antibodies (1:500, Invitrogen) and  
610 DAPI/antifade (1:200, Invitrogen). Images were captured using a confocal laser scanning

611 microscope equipped with visible and near-infrared lasers. Images were acquired using the  
612 Airyscan mode supported by the LSM 880 confocal laser scanning microscope for image  
613 optimization (Carl Zeiss, Oberkochen, Germany).

614

### 615 **Immunoprecipitation (IP)**

616 Pre-osteoblasts isolated from mouse calvaria were cultured for 7 days in a BMP2-containing  
617 or normal medium (CTRL). The cells were lysed with an IP lysis buffer (150 mM NaCl, 25  
618 mM Tris-HCl, 10% glycerol, and 1 mM EDTA) containing a protease inhibitor cocktail (Roche,  
619 Basel, Switzerland). IP was performed with an anti-Prdx5 antibody (Ab Frontier). Sodium  
620 dodecyl sulfate-polyacrylamide gel electrophoresis and in-gel digestion were performed as  
621 previously described (Yun et al., 2018). Briefly, the sliced gel was dried and digested in  
622 trypsin. The tryptic peptides were dried and extracted for LC-MS/MS.

623 The lysed cells were centrifuged, and equal amounts of proteins were incubated with an  
624 anti-Prdx5 antibody, or an IgG rabbit polyclonal antibody (Cell Signaling Technology) as a  
625 negative control. The proteins were further incubated with protein A/G-sepharose beads (GE  
626 Healthcare) for 2 hours. The beads were then washed five times with a lysis buffer to  
627 remove the immunocaptured proteins, boiled, and then subjected to western blot analysis  
628 using anti-Prdx5 (1:500, Ab Frontier) and anti-hnRNPK (1:500, Cell Signaling Technology)  
629 antibodies.

630

### 631 **LC-MS/MS analysis**

632 The tryptic peptides were analyzed according to a modified method previously used for LC-  
633 MS/MS analysis (Lee et al., 2016). Briefly, the tryptic peptides were loaded onto an MGU-30  
634 C18 trapping column (LC Packings, Amsterdam, The Netherlands). Concentrated tryptic

635 peptides were eluted from the column and directed into a 10 cm × 75 µm I.D. C18 reverse  
636 phase column at a flow rate of 300 nL/min. The peptides underwent gradient elution in 0–55%  
637 acetonitrile over 100 min. MS and MS/MS spectra were acquired in the data-dependent  
638 mode using the LTQ-Velos ESI ion trap mass spectrometer (Thermo Fisher Scientific). For  
639 protein identification, MS/MS spectra were analyzed with MASCOT version 2.4 (Matrix  
640 Science, UK) using the mouse protein database downloaded from Uniprot. The mass  
641 tolerance for the parent or fragmentation was 0.8 Da. Carbamidomethylation of cysteine and  
642 oxidation of methionine were considered in MS/MS analysis as variable modifications of the  
643 tryptic peptides. The MS/MS data were filtered according to a false discovery rate criterion of  
644 1%. Each sample was analyzed in triplicate. For protein quantification, we used the mol%  
645 value, which was calculated from the emPAI values in the MASCOT program (Lee et al.,  
646 2016; Yun et al., 2018). The canonical pathway of Prdx5-interacting proteins was screened  
647 using Ingenuity Pathway Analysis (IPA, Ingenuity Systems, Redwood City, CA,  
648 [www.ingenuity.com](http://www.ingenuity.com)), which leverages the Ingenuity Knowledge Base. Protein-protein  
649 interactions were constructed using STRING v11 (Szklarczyk et al., 2019).

650

### 651 **Luciferase reporter assays**

652 MC3T3-E1 cells were cultured in  $\alpha$ -MEM containing 10% FBS and 1% penicillin-  
653 streptomycin and transiently transfected with pGL3-OG2-Luc reporters using Lipofectamine  
654 3000 (Invitrogen). The transfection efficiency was determined by co-transfecting the cells  
655 with a beta-galactosidase reporter (SV- $\beta$ -gal). The reporter vectors were obtained from  
656 professor Won-Gu Jang, Daegu University, South Korea. The cells were transfected again  
657 with scrambled siRNA, Prdx5 siRNA, or pCMV-HA-Prdx5 plasmids. After the cells were  
658 recovered, osteoblast differentiation was induced by incubating them with 200 ng/mL BMP2  
659 for 72 hours. Luciferase activity was measured using a luciferase reporter assay system  
660 (Promega) and a luminometer (SpectraMax i3x, Molecular Devices) according to the

661 manufacturer's instructions. The experiments were performed in triplicate and repeated  
662 thrice.

663

#### 664 **RNA-seq analysis**

665 BMMs were cultured for 4 days in an M-CSF and RANKL-containing medium for  
666 differentiating them into osteoclasts, and then lysed for RNA extraction. RNA was isolated  
667 using the RNeasy Mini Kit (Qiagen, Hilden, Germany), and quality control and sequencing  
668 were performed by Macrogen Inc. (Seoul, Republic of Korea). Briefly, a cDNA library was  
669 prepared using the TruSeq Stranded mRNA LT Sample prep kit (Illumina Inc.), and cDNA  
670 was synthesized using SuperScript II reverse transcriptase (Thermo Fisher Scientific).

671 All raw sequence reads were preprocessed using Trimmomatic (version 0.39) (Bolger et  
672 al., 2014) to remove adapter sequences and bases with low sequencing quality. The  
673 remaining clean reads were mapped based on the mouse reference genome (mm10) using  
674 Hisat2 (v2.1.0) (Kim et al., 2015) with the default parameters. BAM files generated by HiSat2  
675 were further processed with Cufflinks (v2.2.1) (Trapnell et al., 2012) to quantify transcript  
676 abundance using the fragment per kilobase of exon per million fragments mapped (FPKM)  
677 normalization. Differential expression was analyzed using Cuffdiff (v2.2.1) to identify DEGs  
678 with FPKM > 1 in at least one sample and q-value < 0.05. We performed enrichment  
679 analysis of GO categories using the DAVID functional annotation tool  
680 (<https://www.david.ncifcrf.gov>). The mouse reference genome sequence and annotation data  
681 were downloaded from the UCSC genome browser (<https://www.genome.ucsc.edu>), and the  
682 R software was used to visualize the results.

683

#### 684 **Statistics**

685 Each experiment with cells was repeated at least thrice. Data are presented as mean  $\pm$   
686 standard error of the mean (SEM), unless indicated with the standard deviation (SD). The  
687 statistical analysis tests performed were a two-tailed Student's *t*-test or one-way analysis of  
688 variance (ANOVA), followed by the least significant difference test for data with a normal  
689 distribution or the Kruskal–Wallis test for data not normally distributed. Image-based data  
690 were analyzed using the GraphPad Prism statistical software. Differences were considered  
691 statistically significant at \* $p < 0.05$  and \*\* $p < 0.01$ .

692

### 693 **Data Availability**

694 Proteomics data that support the findings of the current study have been deposited to the  
695 ProteomeXchange Consortium via the PRIDE (Perez-Riverol et al., 2019) partner repository  
696 with the dataset identifiers PXD020082 and 10.6019/PXD020082.

697

### 698 **Acknowledgements**

699 This work was supported by the Korea Mouse Phenotyping Project (2014M3A9D5A0107365)  
700 of the Ministry of Science and ICT through the National Research Foundation.

701

### 702 **Competing interest**

703 The authors declare no competing interests.

704

### 705 **References**

706 Au, P. Y. B., Goedhart, C., Ferguson, M., Breckpot, J., Devriendt, K., Wierenga, K., Fanning,  
707 E., Grange, D. K., Graham, G. E., Galarreta, C., Jones, M. C., Kini, U., Stewart, H.,  
708 Parboosingh, J. S., Kline, A. D., Innes, A. M., & Care for Rare Canada, C. (2018).



- 709 Phenotypic spectrum of Au-Kline syndrome: a report of six new cases and review of  
710 the literature. *Eur J Hum Genet*, 26(9), 1272-1281. [https://doi.org/10.1038/s41431-](https://doi.org/10.1038/s41431-018-0187-2)  
711 [018-0187-2](https://doi.org/10.1038/s41431-018-0187-2)
- 712 Bellows, C. G., Aubin, J. E., Heersche, J. N., & Antosz, M. E. (1986). Mineralized bone  
713 nodules formed in vitro from enzymatically released rat calvaria cell populations.  
714 *Calcif Tissue Int*, 38(3), 143-154. <https://www.ncbi.nlm.nih.gov/pubmed/3085892>
- 715 Bolger, A. M., Lohse, M., & Usadel, B. (2014). Trimmomatic: a flexible trimmer for Illumina  
716 sequence data. *Bioinformatics*, 30(15), 2114-2120.  
717 <https://doi.org/10.1093/bioinformatics/btu170>
- 718 Chae, H. Z., Robison, K., Poole, L. B., Church, G., Storz, G., & Rhee, S. G. (1994). Cloning  
719 and sequencing of thiol-specific antioxidant from mammalian brain: alkyl  
720 hydroperoxide reductase and thiol-specific antioxidant define a large family of  
721 antioxidant enzymes. *Proc Natl Acad Sci U S A*, 91(15), 7017-7021.  
722 <https://doi.org/10.1073/pnas.91.15.7017>
- 723 Cho, E., Chen, Z., Ding, M., Seong, J., Lee, S., Min, S. H., Choi, D. K., & Lee, T. H. (2021).  
724 PMSA prevents osteoclastogenesis and estrogen-dependent bone loss in mice.  
725 *Bone*, 142, 115707. <https://doi.org/10.1016/j.bone.2020.115707>
- 726 Choi, H. I., Chung, K. J., Yang, H. Y., Ren, L., Sohn, S., Kim, P. R., Kook, M. S., Choy, H. E.,  
727 & Lee, T. H. (2013). Peroxiredoxin V selectively regulates IL-6 production by  
728 modulating the Jak2-Stat5 pathway. *Free Radic Biol Med*, 65, 270-279.  
729 <https://doi.org/10.1016/j.freeradbiomed.2013.06.038>
- 730 Choi, H. I., Kim, D. H., Park, J. S., Kim, I. J., Kim, C. S., Bae, E. H., Ma, S. K., Lee, T. H., &  
731 Kim, S. W. (2019). Peroxiredoxin V (PrdxV) negatively regulates EGFR/Stat3-  
732 mediated fibrogenesis via a Cys48-dependent interaction between PrdxV and Stat3.  
733 *Sci Rep*, 9(1), 8751. <https://doi.org/10.1038/s41598-019-45347-0>
- 734 Chung, K. J., Cho, E. J., Kim, M. K., Kim, Y. R., Kim, S. H., Yang, H. Y., Chung, K. C., Lee,  
735 S. E., Rhee, J. H., Choy, H. E., & Lee, T. H. (2010). RtxA1-induced expression of the  
736 small GTPase Rac2 plays a key role in the pathogenicity of *Vibrio vulnificus*. *J Infect*  
737 *Dis*, 201(1), 97-105. <https://doi.org/10.1086/648612>
- 738 Compston, J. E., McClung, M. R., & Leslie, W. D. (2019). Osteoporosis. *Lancet*, 393(10169),  
739 364-376. [https://doi.org/10.1016/S0140-6736\(18\)32112-3](https://doi.org/10.1016/S0140-6736(18)32112-3)
- 740 Demontiero, O., Vidal, C., & Duque, G. (2012). Aging and bone loss: new insights for the  
741 clinician. *Ther Adv Musculoskelet Dis*, 4(2), 61-76.  
742 <https://doi.org/10.1177/1759720X11430858>
- 743 Denisenko, O., & Bomsztyk, K. (2002). Yeast hnRNP K-like genes are involved in regulation  
744 of the telomeric position effect and telomere length. *Mol Cell Biol*, 22(1), 286-297.  
745 <https://doi.org/10.1128/mcb.22.1.286-297.2002>
- 746 Dentici, M. L., Barresi, S., Niceta, M., Pantaleoni, F., Pizzi, S., Dallapiccola, B., Tartaglia, M.,  
747 & Digilio, M. C. (2018). Clinical spectrum of Kabuki-like syndrome caused by  
748 HNRNPK haploinsufficiency. *Clin Genet*, 93(2), 401-407.  
749 <https://doi.org/10.1111/cge.13029>
- 750 Dreyfuss, G., Matunis, M. J., Pinol-Roma, S., & Burd, C. G. (1993). hnRNP proteins and the  
751 biogenesis of mRNA. *Annu Rev Biochem*, 62, 289-321.  
752 <https://doi.org/10.1146/annurev.bi.62.070193.001445>
- 753 Expert-Bezancon, A., Le Caer, J. P., & Marie, J. (2002). Heterogeneous nuclear  
754 ribonucleoprotein (hnRNP) K is a component of an intronic splicing enhancer  
755 complex that activates the splicing of the alternative exon 6A from chicken beta-  
756 tropomyosin pre-mRNA. *J Biol Chem*, 277(19), 16614-16623.  
757 <https://doi.org/10.1074/jbc.M201083200>
- 758 Fan, X., Xiong, H., Wei, J., Gao, X., Feng, Y., Liu, X., Zhang, G., He, Q. Y., Xu, J., & Liu, L.  
759 (2015). Cytoplasmic hnRNP K interacts with GSK3beta and is essential for the  
760 osteoclast differentiation. *Sci Rep*, 5, 17732. <https://doi.org/10.1038/srep17732>

- 761 Gallardo, M., Lee, H. J., Zhang, X., Bueso-Ramos, C., Pagon, L. R., McArthur, M., Multani,  
762 A., Nazha, A., Manshouri, T., Parker-Thornburg, J., Rapado, I., Quintas-Cardama, A.,  
763 Kornblau, S. M., Martinez-Lopez, J., & Post, S. M. (2015). hnRNP K Is a  
764 Haploinsufficient Tumor Suppressor that Regulates Proliferation and Differentiation  
765 Programs in Hematologic Malignancies. *Cancer Cell*, 28(4), 486-499.  
766 <https://doi.org/10.1016/j.ccell.2015.09.001>
- 767 Ji, Y., Chae, S., Lee, H. K., Park, I., Kim, C., Ismail, T., Kim, Y., Park, J. W., Kwon, O. S.,  
768 Kang, B. S., Lee, D. S., Bae, J. S., Kim, S. H., Moon, P. G., Baek, M. C., Park, M. J.,  
769 Kil, I. S., Rhee, S. G., Kim, J., . . . Lee, H. S. (2019). Peroxiredoxin5 Controls  
770 Vertebrate Ciliogenesis by Modulating Mitochondrial Reactive Oxygen Species.  
771 *Antioxid Redox Signal*, 30(14), 1731-1745. <https://doi.org/10.1089/ars.2018.7507>
- 772 Kim, D., Langmead, B., & Salzberg, S. L. (2015). HISAT: a fast spliced aligner with low  
773 memory requirements. *Nat Methods*, 12(4), 357-360.  
774 <https://doi.org/10.1038/nmeth.3317>
- 775 Kim, M. H., Park, S. J., Kim, J. H., Seong, J. B., Kim, K. M., Woo, H. A., & Lee, D. S. (2018).  
776 Peroxiredoxin 5 regulates adipogenesis-attenuating oxidative stress in obese mouse  
777 models induced by a high-fat diet. *Free Radic Biol Med*, 123, 27-38.  
778 <https://doi.org/10.1016/j.freeradbiomed.2018.05.061>
- 779 Kim, M. H., Seong, J. B., Huh, J. W., Bae, Y. C., Lee, H. S., & Lee, D. S. (2020).  
780 Peroxiredoxin 5 ameliorates obesity-induced non-alcoholic fatty liver disease through  
781 the regulation of oxidative stress and AMP-activated protein kinase signaling. *Redox*  
782 *Biol*, 28, 101315. <https://doi.org/10.1016/j.redox.2019.101315>
- 783 Knothe Tate, M. L., Adamson, J. R., Tami, A. E., & Bauer, T. W. (2004). The osteocyte. *Int J*  
784 *Biochem Cell Biol*, 36(1), 1-8. [https://doi.org/10.1016/s1357-2725\(03\)00241-3](https://doi.org/10.1016/s1357-2725(03)00241-3)
- 785 Kodama, J., & Kaito, T. (2020). Osteoclast Multinucleation: Review of Current Literature. *Int*  
786 *J Mol Sci*, 21(16). <https://doi.org/10.3390/ijms21165685>
- 787 Krecic, A. M., & Swanson, M. S. (1999). hnRNP complexes: composition, structure, and  
788 function. *Curr Opin Cell Biol*, 11(3), 363-371. [https://doi.org/10.1016/S0955-0674\(99\)80051-9](https://doi.org/10.1016/S0955-0674(99)80051-9)
- 789 Lean, J., Kirstein, B., Urry, Z., Chambers, T., & Fuller, K. (2004). Thioredoxin-1 mediates  
790 osteoclast stimulation by reactive oxygen species. *Biochem Biophys Res Commun*,  
791 321(4), 845-850. <https://doi.org/10.1016/j.bbrc.2004.07.035>
- 792 Lee, D. G., Kam, M. K., Lee, S. R., Lee, H. J., & Lee, D. S. (2020). Peroxiredoxin 5  
793 deficiency exacerbates iron overload-induced neuronal death via ER-mediated  
794 mitochondrial fission in mouse hippocampus. *Cell Death Dis*, 11(3), 204.  
795 <https://doi.org/10.1038/s41419-020-2402-7>
- 796 Lee, S. Y., Kim, G. H., Yun, S. H., Choi, C. W., Yi, Y. S., Kim, J., Chung, Y. H., Park, E. C., &  
797 Kim, S. I. (2016). Proteogenomic Characterization of Monocyclic Aromatic  
798 Hydrocarbon Degradation Pathways in the Aniline-Degrading Bacterium *Burkholderia*  
799 *sp. K24*. *PLoS One*, 11(4), e0154233. <https://doi.org/10.1371/journal.pone.0154233>
- 800 Lim, K. E., Park, N. R., Che, X. G., Han, M. S., Jeong, J. H., Kim, S. Y., Park, C. Y., Akiyama,  
801 H., Kim, J. E., Ryoo, H. M., Stein, J. L., Lian, J. B., Stein, G. S., & Choi, J. Y. (2015).  
802 Core Binding Factor beta of Osteoblasts Maintains Cortical Bone Mass via  
803 Stabilization of Runx2 in Mice. *Journal of Bone and Mineral Research*, 30(4), 715-  
804 722. <https://doi.org/10.1002/jbmr.2397>
- 805 Michael, W. M., Eder, P. S., & Dreyfuss, G. (1997). The K nuclear shuttling domain: a novel  
806 signal for nuclear import and nuclear export in the hnRNP K protein. *EMBO J*, 16(12),  
807 3587-3598. <https://doi.org/10.1093/emboj/16.12.3587>
- 808 Michelotti, E. F., Michelotti, G. A., Aronsohn, A. I., & Levens, D. (1996). Heterogeneous  
809 nuclear ribonucleoprotein K is a transcription factor. *Mol Cell Biol*, 16(5), 2350-2360.  
810 <https://doi.org/10.1128/mcb.16.5.2350>
- 811 Mikula, M., Gaj, P., Dzwonek, K., Rubel, T., Karczmarski, J., Paziewska, A., Dzwonek, A.,  
812

- 813 Bragoszewski, P., Dadlez, M., & Ostrowski, J. (2010). Comprehensive analysis of the  
814 palindromic motif TCTCGCGAGA: a regulatory element of the HNRNPK promoter.  
815 *DNA Res*, 17(4), 245-260. <https://doi.org/10.1093/dnares/dsq016>
- 816 Milat, F., & Ebeling, P. R. (2016). Osteoporosis treatment: a missed opportunity. *Med J Aust*,  
817 205(4), 185-190. <https://www.ncbi.nlm.nih.gov/pubmed/27510350>
- 818 Naarmann, I. S., Harnisch, C., Flach, N., Kremmer, E., Kuhn, H., Ostareck, D. H., &  
819 Ostareck-Lederer, A. (2008). mRNA silencing in human erythroid cell maturation:  
820 heterogeneous nuclear ribonucleoprotein K controls the expression of its regulator c-  
821 Src. *J Biol Chem*, 283(26), 18461-18472. <https://doi.org/10.1074/jbc.M710328200>
- 822 Nagy, V., & Penninger, J. M. (2015). The RANKL-RANK Story. *Gerontology*, 61(6), 534-542.  
823 <https://doi.org/10.1159/000371845>
- 824 Niger, C., Lima, F., Yoo, D. J., Gupta, R. R., Buo, A. M., Hebert, C., & Stains, J. P. (2011).  
825 The transcriptional activity of osterix requires the recruitment of Sp1 to the  
826 osteocalcin proximal promoter. *Bone*, 49(4), 683-692.  
827 <https://doi.org/10.1016/j.bone.2011.07.027>
- 828 Ostareck, D. H., Ostareck-Lederer, A., Wilm, M., Thiele, B. J., Mann, M., & Hentze, M. W.  
829 (1997). mRNA silencing in erythroid differentiation: hnRNP K and hnRNP E1 regulate  
830 15-lipoxygenase translation from the 3' end. *Cell*, 89(4), 597-606.  
831 [https://doi.org/10.1016/s0092-8674\(00\)80241-x](https://doi.org/10.1016/s0092-8674(00)80241-x)
- 832 Park, J., Choi, H., Kim, B., Chae, U., Lee, D. G., Lee, S. R., Lee, S., Lee, H. S., & Lee, D. S.  
833 (2016). Peroxiredoxin 5 (Prx5) decreases LPS-induced microglial activation through  
834 regulation of Ca(2+)/calcineurin-Drp1-dependent mitochondrial fission. *Free Radic*  
835 *Biol Med*, 99, 392-404. <https://doi.org/10.1016/j.freeradbiomed.2016.08.030>
- 836 Park, J., Kim, B., Chae, U., Lee, D. G., Kam, M. K., Lee, S. R., Lee, S., Lee, H. S., Park, J.  
837 W., & Lee, D. S. (2017). Peroxiredoxin 5 Decreases Beta-Amyloid-Mediated Cyclin-  
838 Dependent Kinase 5 Activation Through Regulation of Ca(2+)-Mediated Calpain  
839 Activation. *Antioxid Redox Signal*, 27(11), 715-726.  
840 <https://doi.org/10.1089/ars.2016.6810>
- 841 Park, K. R., Yun, H. M., Yeo, I. J., Cho, S., Hong, J. T., & Jeong, Y. S. (2019). Peroxiredoxin  
842 6 Inhibits Osteogenic Differentiation and Bone Formation Through Human Dental  
843 Pulp Stem Cells and Induces Delayed Bone Development. *Antioxid Redox Signal*,  
844 30(17), 1969-1982. <https://doi.org/10.1089/ars.2018.7530>
- 845 Perez-Riverol, Y., Csordas, A., Bai, J., Bernal-Llinares, M., Hewapathirana, S., Kundu, D. J.,  
846 Inuganti, A., Griss, J., Mayer, G., Eisenacher, M., Perez, E., Uszkoreit, J., Pfeuffer, J.,  
847 Sachsenberg, T., Yilmaz, S., Tiwary, S., Cox, J., Audain, E., Walzer, M., . . . Vizcaino,  
848 J. A. (2019). The PRIDE database and related tools and resources in 2019:  
849 improving support for quantification data. *Nucleic Acids Res*, 47(D1), D442-D450.  
850 <https://doi.org/10.1093/nar/gky1106>
- 851 Perrotti, D., & Neviani, P. (2007). From mRNA metabolism to cancer therapy: chronic  
852 myelogenous leukemia shows the way. *Clin Cancer Res*, 13(6), 1638-1642.  
853 <https://doi.org/10.1158/1078-0432.CCR-06-2320>
- 854 Rhee, S. G. (2016). Overview on Peroxiredoxin. *Mol Cells*, 39(1), 1-5.  
855 <https://doi.org/10.14348/molcells.2016.2368>
- 856 Rhee, S. G., Kang, S. W., Chang, T. S., Jeong, W., & Kim, K. (2001). Peroxiredoxin, a novel  
857 family of peroxidases. *IUBMB Life*, 52(1-2), 35-41.  
858 <https://doi.org/10.1080/15216540252774748>
- 859 Rhee, S. G., Woo, H. A., Kil, I. S., & Bae, S. H. (2012). Peroxiredoxin functions as a  
860 peroxidase and a regulator and sensor of local peroxides. *J Biol Chem*, 287(7), 4403-  
861 4410. <https://doi.org/10.1074/jbc.R111.283432>
- 862 Ritchie, S. A., Pasha, M. K., Batten, D. J., Sharma, R. K., Olson, D. J., Ross, A. R., &  
863 Bonham, K. (2003). Identification of the SRC pyrimidine-binding protein (SPy) as  
864 hnRNP K: implications in the regulation of SRC1A transcription. *Nucleic Acids Res*,

- 865 31(5), 1502-1513. <https://doi.org/10.1093/nar/gkg246>
- 866 Saag, K. G., Petersen, J., Brandi, M. L., Karaplis, A. C., Lorentzon, M., Thomas, T., Maddox,  
867 J., Fan, M., Meisner, P. D., & Grauer, A. (2017). Romosozumab or Alendronate for  
868 Fracture Prevention in Women with Osteoporosis. *N Engl J Med*, 377(15), 1417-1427.  
869 <https://doi.org/10.1056/NEJMoa1708322>
- 870 Seong, J. B., Kim, B., Kim, S., Kim, M. H., Park, Y. H., Lee, Y., Lee, H. J., Hong, C. W., &  
871 Lee, D. S. (2021). Macrophage peroxiredoxin 5 deficiency promotes lung cancer  
872 progression via ROS-dependent M2-like polarization. *Free Radic Biol Med*, 176, 322-  
873 334. <https://doi.org/10.1016/j.freeradbiomed.2021.10.010>
- 874 Sims, N. A., & Walsh, N. C. (2012). Intercellular cross-talk among bone cells: new factors  
875 and pathways. *Curr Osteoporos Rep*, 10(2), 109-117. <https://doi.org/10.1007/s11914-012-0096-1>
- 876
- 877 Siomi, H., Choi, M., Siomi, M. C., Nussbaum, R. L., & Dreyfuss, G. (1994). Essential role for  
878 KH domains in RNA binding: impaired RNA binding by a mutation in the KH domain  
879 of FMR1 that causes fragile X syndrome. *Cell*, 77(1), 33-39.  
880 [https://doi.org/10.1016/0092-8674\(94\)90232-1](https://doi.org/10.1016/0092-8674(94)90232-1)
- 881 Stains, J. P., Lecanda, F., Towler, D. A., & Civitelli, R. (2005). Heterogeneous nuclear  
882 ribonucleoprotein K represses transcription from a cytosine/thymidine-rich element in  
883 the osteocalcin promoter. *Biochem J*, 385(Pt 2), 613-623.  
884 <https://doi.org/10.1042/BJ20040680>
- 885 Szklarczyk, D., Gable, A. L., Lyon, D., Junge, A., Wyder, S., Huerta-Cepas, J., Simonovic,  
886 M., Doncheva, N. T., Morris, J. H., Bork, P., Jensen, L. J., & Mering, C. V. (2019).  
887 STRING v11: protein-protein association networks with increased coverage,  
888 supporting functional discovery in genome-wide experimental datasets. *Nucleic Acids  
889 Res*, 47(D1), D607-D613. <https://doi.org/10.1093/nar/gky1131>
- 890 Tomonaga, T., & Levens, D. (1996). Activating transcription from single stranded DNA. *Proc  
891 Natl Acad Sci U S A*, 93(12), 5830-5835. <https://doi.org/10.1073/pnas.93.12.5830>
- 892 Trapnell, C., Roberts, A., Goff, L., Pertea, G., Kim, D., Kelley, D. R., Pimentel, H., Salzberg,  
893 S. L., Rinn, J. L., & Pachter, L. (2012). Differential gene and transcript expression  
894 analysis of RNA-seq experiments with TopHat and Cufflinks. *Nat Protoc*, 7(3), 562-  
895 578. <https://doi.org/10.1038/nprot.2012.016>
- 896 Wang, L., You, X., Zhang, L., Zhang, C., & Zou, W. (2022). Mechanical regulation of bone  
897 remodeling. *Bone Res*, 10(1), 16. <https://doi.org/10.1038/s41413-022-00190-4>
- 898 Wang, Z., Qiu, H., He, J., Liu, L., Xue, W., Fox, A., Tickner, J., & Xu, J. (2020). The  
899 emerging roles of hnRNPK. *J Cell Physiol*, 235(3), 1995-2008.  
900 <https://doi.org/10.1002/jcp.29186>
- 901 Weitzmann, M. N., & Ofotokun, I. (2016). Physiological and pathophysiological bone  
902 turnover - role of the immune system. *Nat Rev Endocrinol*, 12(9), 518-532.  
903 <https://doi.org/10.1038/nrendo.2016.91>
- 904 Yang, H. Y., Kwon, J., Cho, E. J., Choi, H. I., Park, C., Park, H. R., Park, S. H., Chung, K. J.,  
905 Ryoo, Z. Y., Cho, K. O., & Lee, T. H. (2010). Proteomic analysis of protein  
906 expression affected by peroxiredoxin V knock-down in hypoxic kidney. *J Proteome  
907 Res*, 9(8), 4003-4015. <https://doi.org/10.1021/pr100190b>
- 908 Yang, T. L., Shen, H., Liu, A., Dong, S. S., Zhang, L., Deng, F. Y., Zhao, Q., & Deng, H. W.  
909 (2020). A road map for understanding molecular and genetic determinants of  
910 osteoporosis. *Nat Rev Endocrinol*, 16(2), 91-103. <https://doi.org/10.1038/s41574-019-0282-7>
- 911
- 912 Yang, X., & Karsenty, G. (2002). Transcription factors in bone: developmental and  
913 pathological aspects. *Trends Mol Med*, 8(7), 340-345. [https://doi.org/10.1016/s1471-4914\(02\)02340-7](https://doi.org/10.1016/s1471-4914(02)02340-7)
- 914
- 915 Yun, S. H., Park, E. C., Lee, S. Y., Lee, H., Choi, C. W., Yi, Y. S., Ro, H. J., Lee, J. C., Jun,  
916 S., Kim, H. Y., Kim, G. H., & Kim, S. I. (2018). Antibiotic treatment modulates protein

917 components of cytotoxic outer membrane vesicles of multidrug-resistant clinical  
918 strain, *Acinetobacter baumannii* DU202. *Clin Proteomics*, 15, 28.  
919 <https://doi.org/10.1186/s12014-018-9204-2>

920
